# Supplementary material for: Design, synthesis, and biological evaluation of indole-modified tamoxifen relatives as potent anticancer agents
Source: Royal Society of Chemistry journal article supplement (doi:10.1039/d3md00157a), 2023-01-01
Supplement: d3md00157a1.pdf [file d3md00157a1.pdf]

SUPPORTING INFORMATION

**Design, Synthesis, and Biological Evaluation of Indole-Modified Tamoxifen Relatives as Anticancer Agents**

Berrak Ertugrul,<sup>a</sup> Abdulmelik Aytatli,<sup>b,c</sup> Omer Faruk Karatas,<sup>b,c\*</sup> Nurullah Saracoglu<sup>a\*</sup>

<sup>a</sup>Department of Chemistry, Faculty of Sciences, Atatürk University, 25240, Erzurum, Türkiye

<sup>b</sup>Department of Molecular Biology and Genetics, Erzurum Technical University, Erzurum, 25050, Türkiye

<sup>c</sup>Molecular Cancer Biology Laboratory, High Technology Application and Research Center, Erzurum Technical University, Erzurum, 25050, Türkiye

**Table of Contents**

|                                                                                     |               |
|-------------------------------------------------------------------------------------|---------------|
| Comparisons of <sup>1</sup> H NMR spectra                                           | <b>S2</b>     |
| NOE Experiments                                                                     | <b>S3</b>     |
| Figures for Cell Viability experiments of final compounds                           | <b>S4-7</b>   |
| <sup>1</sup> H NMR (400 MHz) and <sup>13</sup> C NMR (100 MHz) spectra of compounds | <b>S9-26</b>  |
| HRMS spectra of compounds                                                           | <b>S27-32</b> |
| HPLC trace for final compounds                                                      | <b>S33-41</b> |

## Comparisons of $^1\text{H}$ NMR spectra

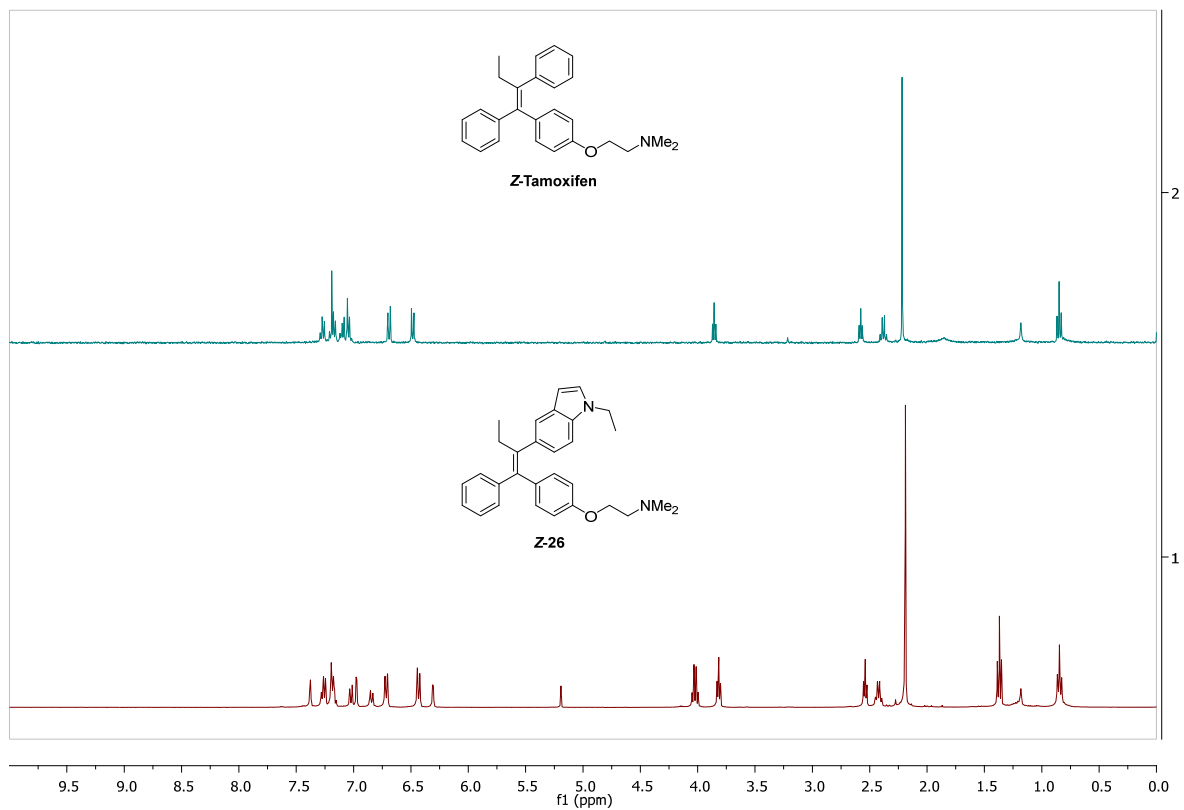

**Figure S1.** Comparison of  $^1\text{H}$  NMR spectra of **Z-Tamoxifen** and **Z-26** compounds.

## NOE Experiments

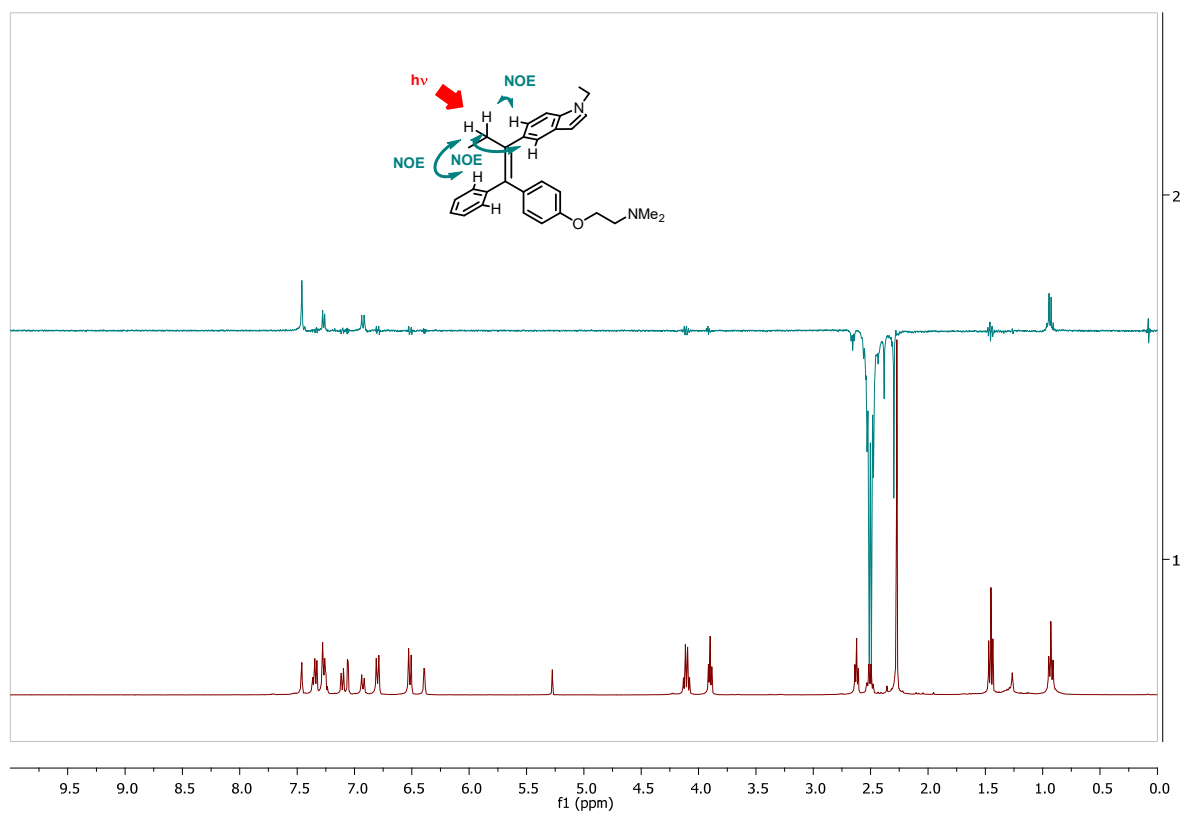

Figure S2. Correlations in compound Z-26.

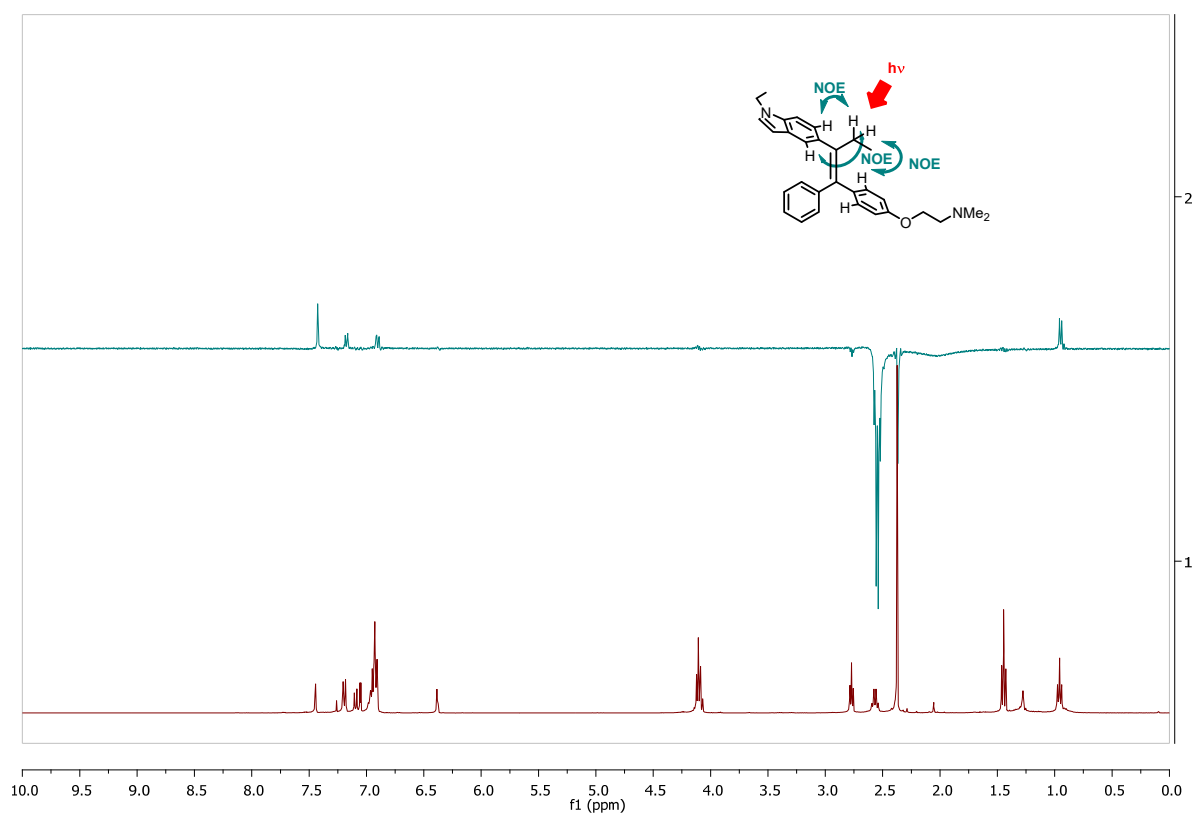

Figure S3. Correlations in compound E-26.

**Figures for cell viability of compounds**

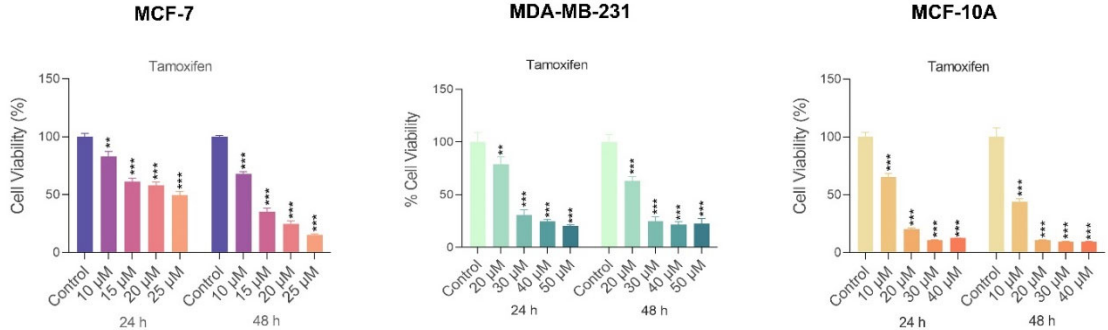

**Figure S4.** Cell viability of MCF-7, MDA-MB-231, and MCF10A cells after treatment at different concentrations of TMX. The bar graph represents the mean ± S.E.M. of four independent experiments. The significance between groups was tested using the Student t-test. \* p < 0.05; \*\* p < 0.01; \*\*\* p < 0.001.

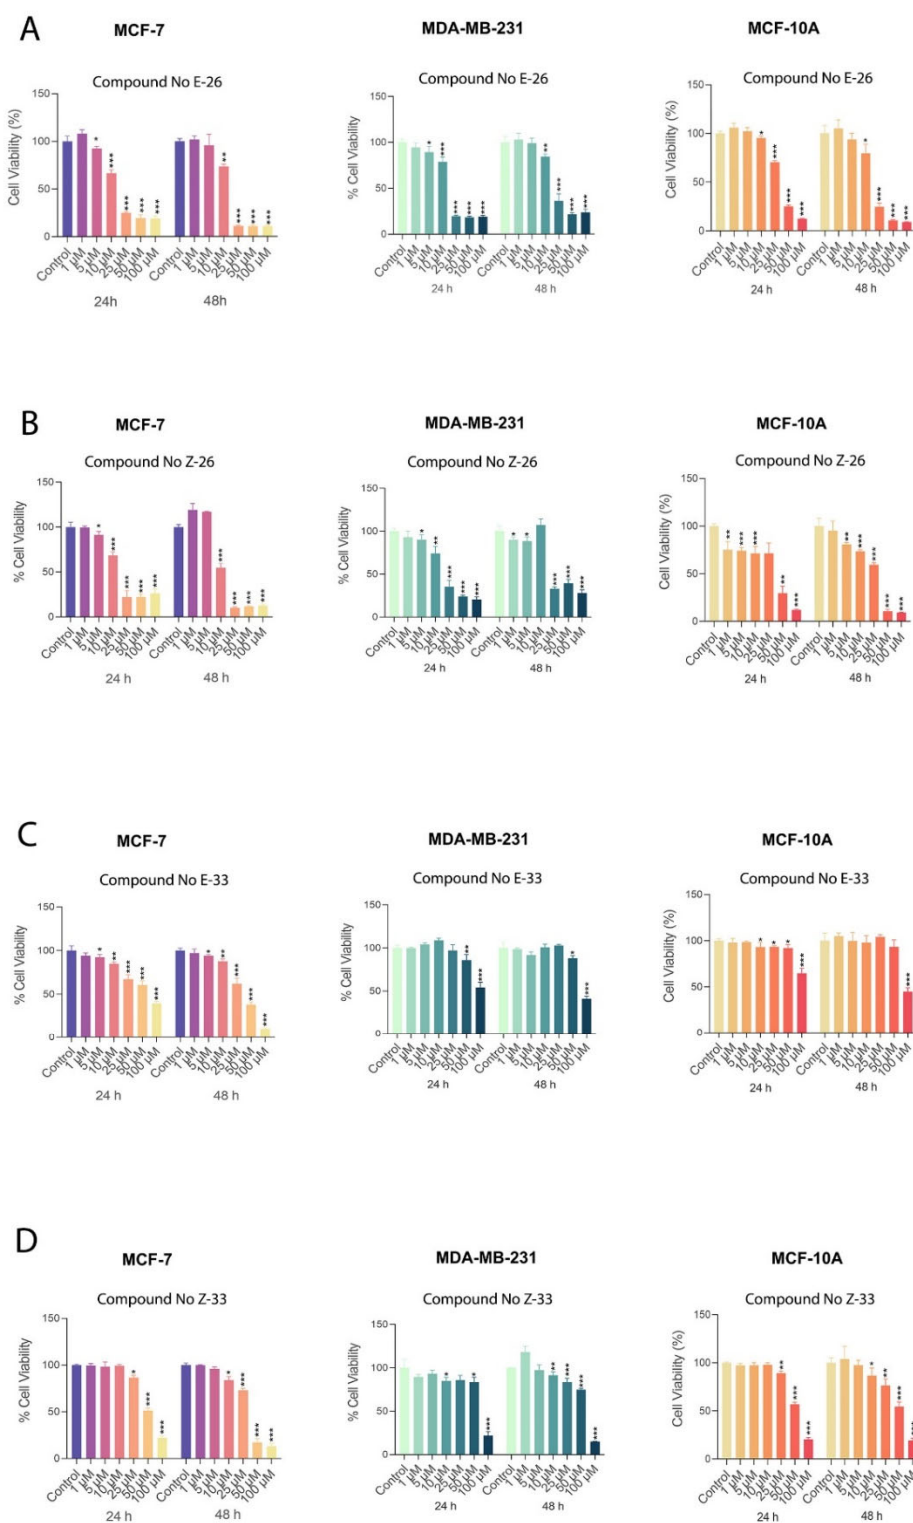

**Figure S5A-D.** Cell viability of MCF-7, MDA-MB-231, and MCF10A cells after treatment at different concentrations of TMX indole-derivatives *E-26*, *Z-26*, *E-33*, and *Z-33*. The bar graph represents the mean  $\pm$  S.E.M. of four independent experiments. The significance between groups was tested using the Student t-test. \*  $p < 0.05$ ; \*\*  $p < 0.01$ ; \*\*\*  $p < 0.001$ .

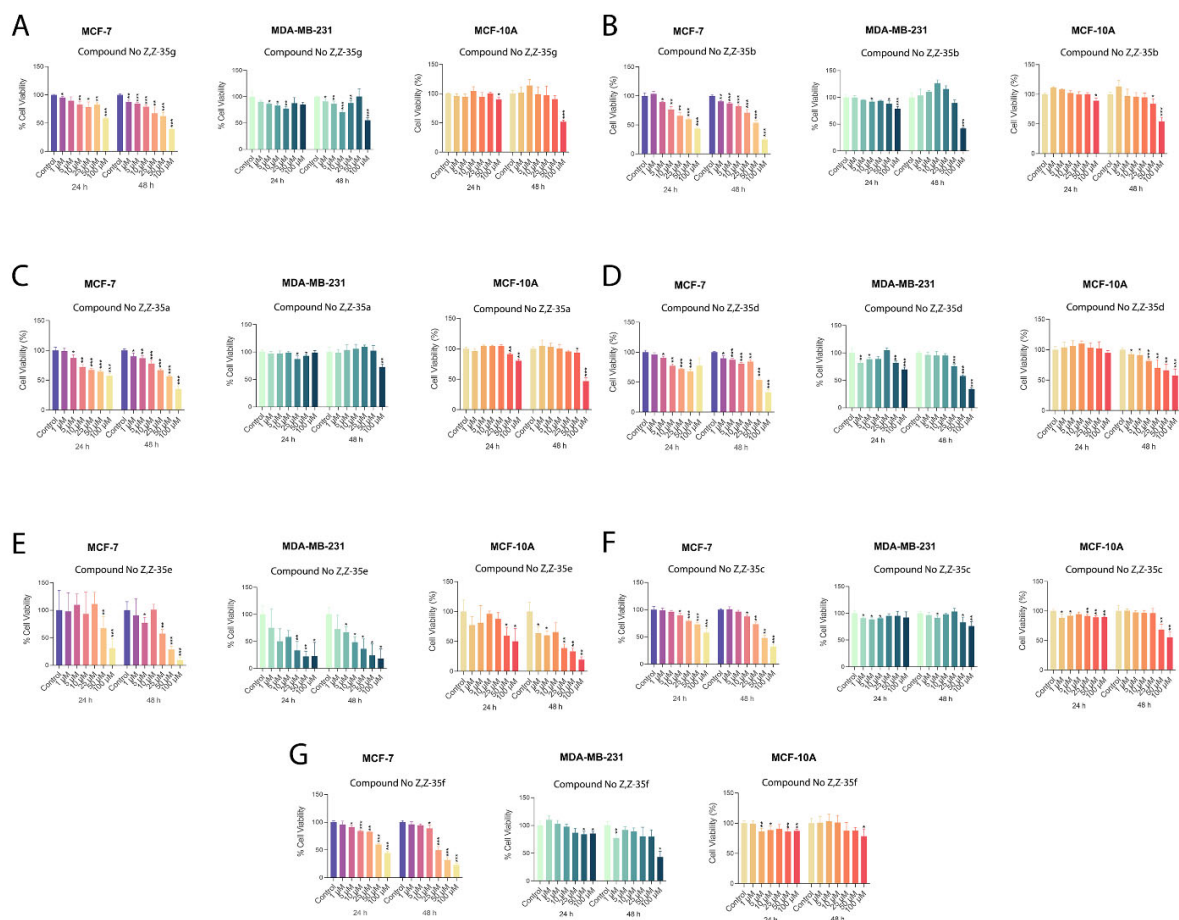

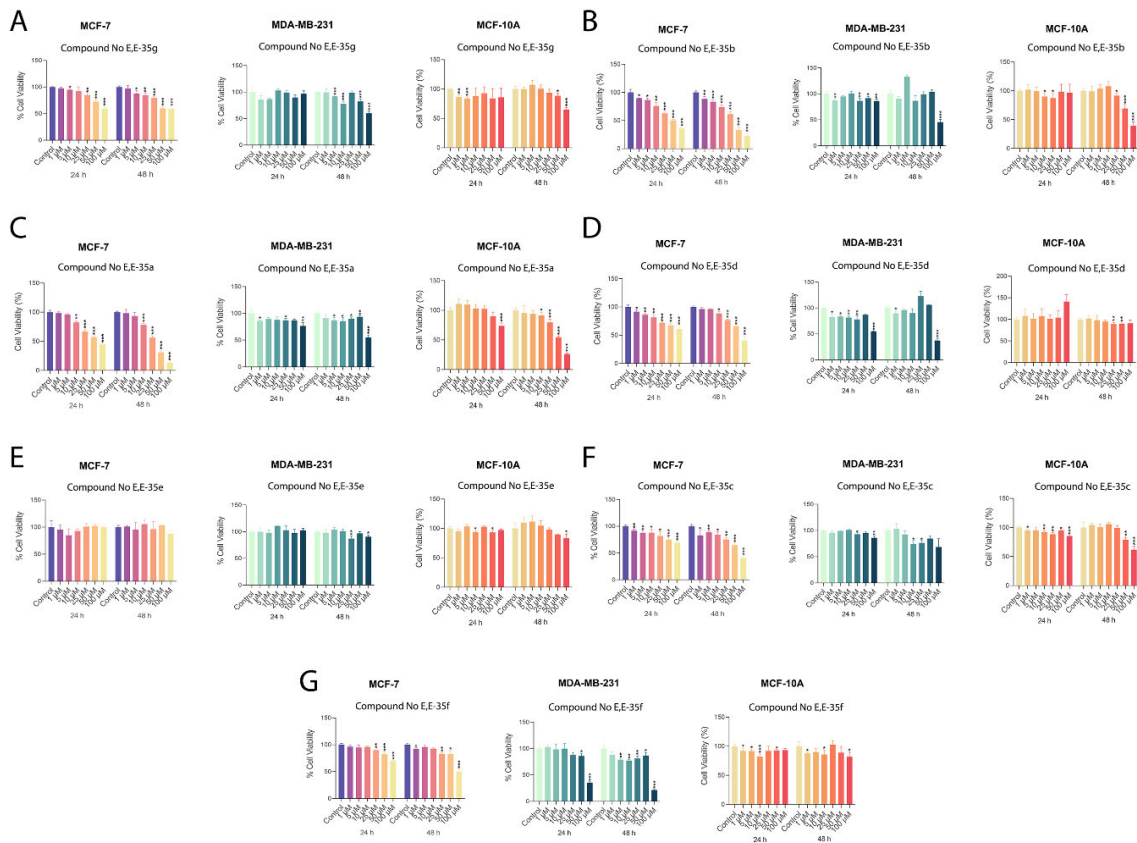

**Figure S7A-G.** Cell viability of MCF-7, MDA-MB-231, and MCF10A cells after treatment at different concentrations of **BIM *E,E*-isomers 35a-g**. The bar graph represents the mean  $\pm$  S.E.M. of four independent experiments. The significance between groups was tested using the Student t-test. \*  $p < 0.05$ ; \*\*  $p < 0.01$ ; \*\*\*  $p < 0.001$ .

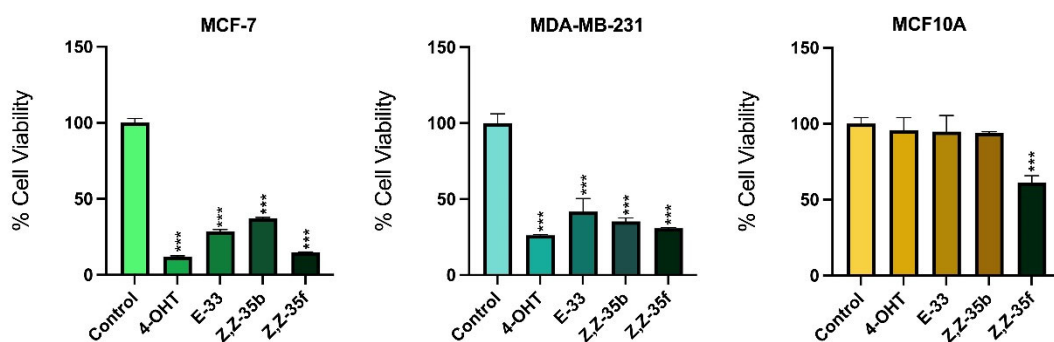

**Figure S8.** Cell viability of MCF-7, MDA-MB-231, and MCF10A cells after treatment with  $IC_{50}$  concentrations of 4-OHT and TMX-related compounds. The bar graph represents the mean  $\pm$  S.E.M. of three independent experiments. Significance between groups was tested using Student t-test. \*  $p < 0.05$ ; \*\*  $p < 0.01$ ; \*\*\*  $p < 0.001$ .

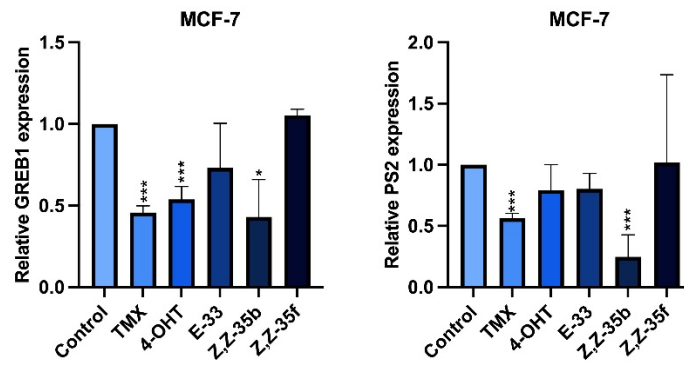

**Figure S9.** Relative expression levels of GREB1 and PS2 genes in MCF-7 cells. The levels of GREB1 and PS2 were normalized to GAPDH. The mean  $\pm$  SEM is shown in Figure 6. \* $p < 0.05$ , \*\* $p < 0.01$ , \*\*\* $p < 0.001$ ; t-test.



# $^1\text{H}$ NMR (400 MHz) and $^{13}\text{C}$ NMR (100 MHz) spectra of compounds

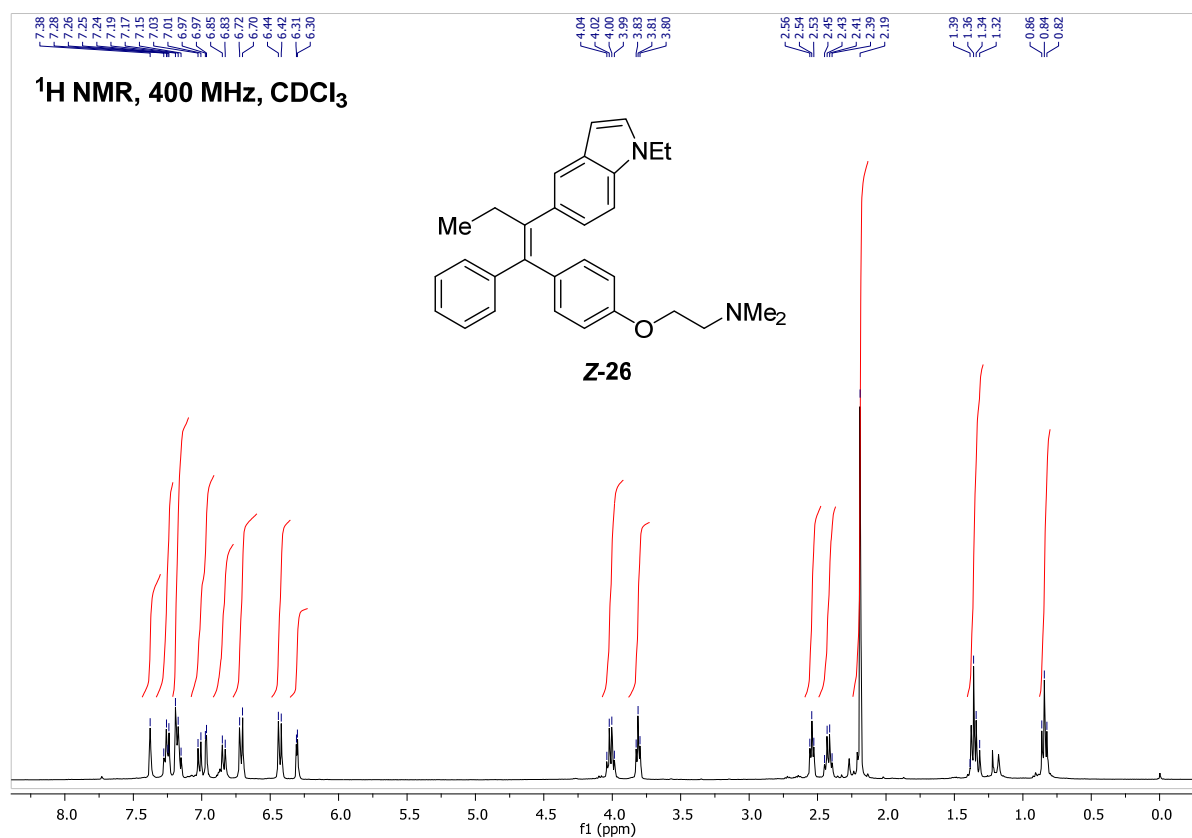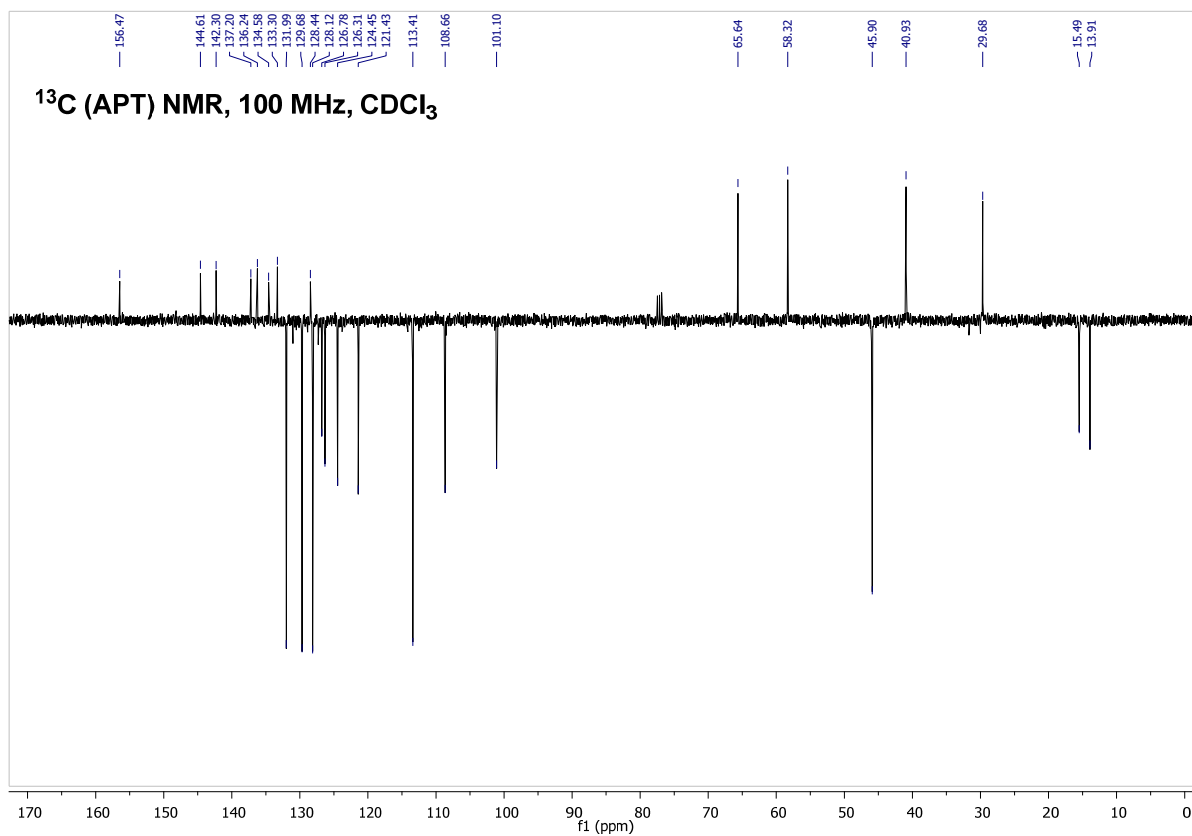

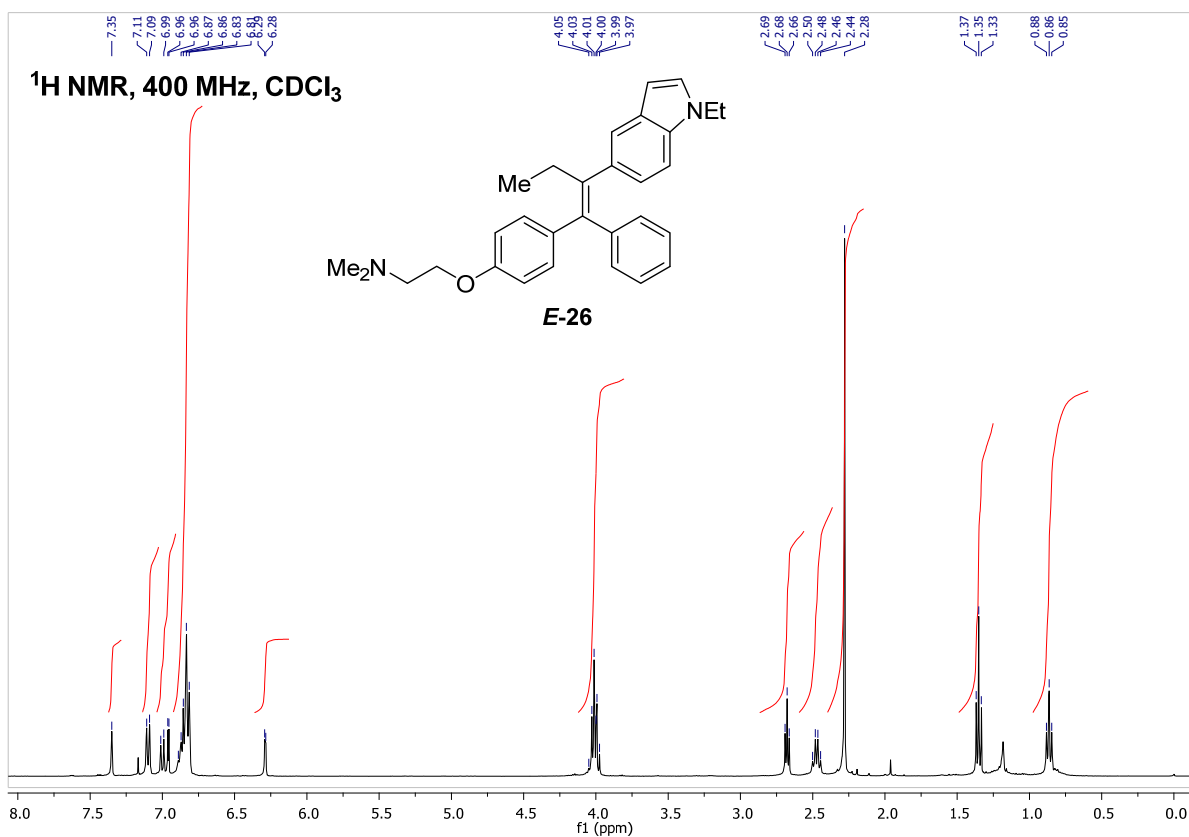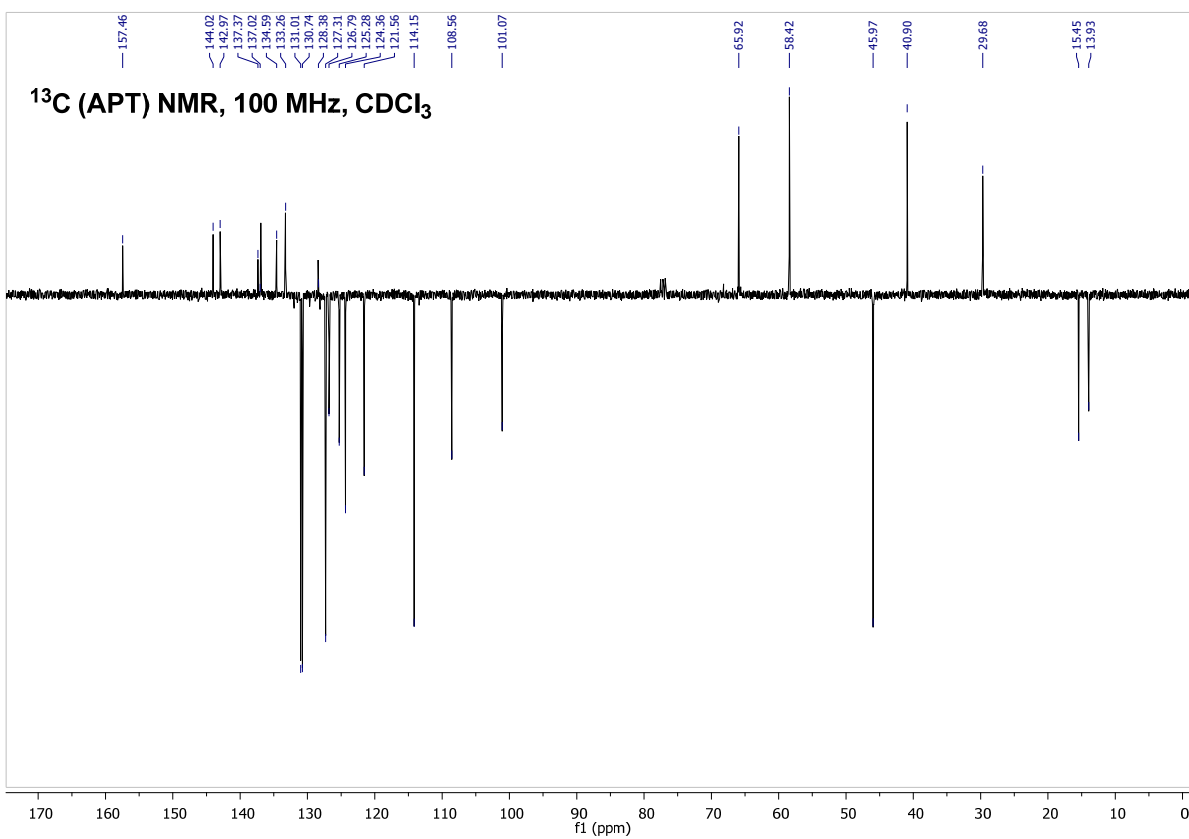

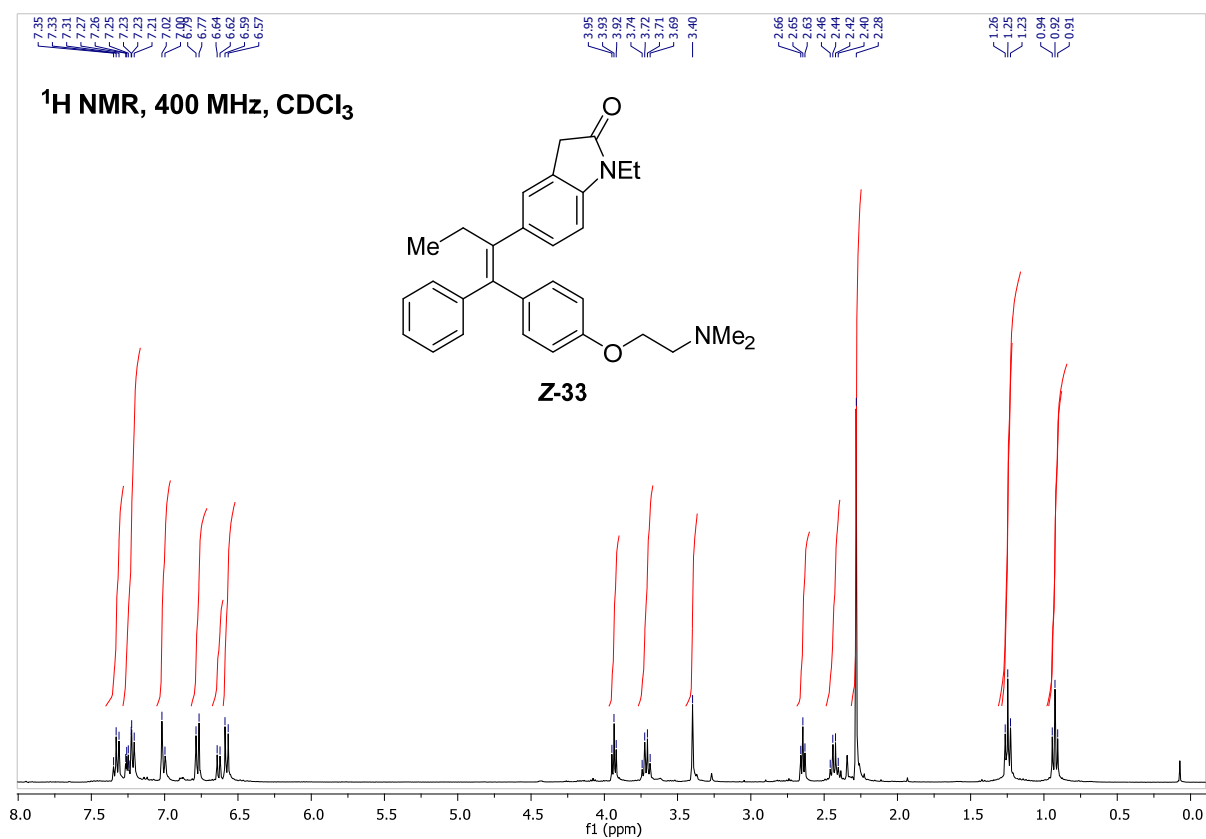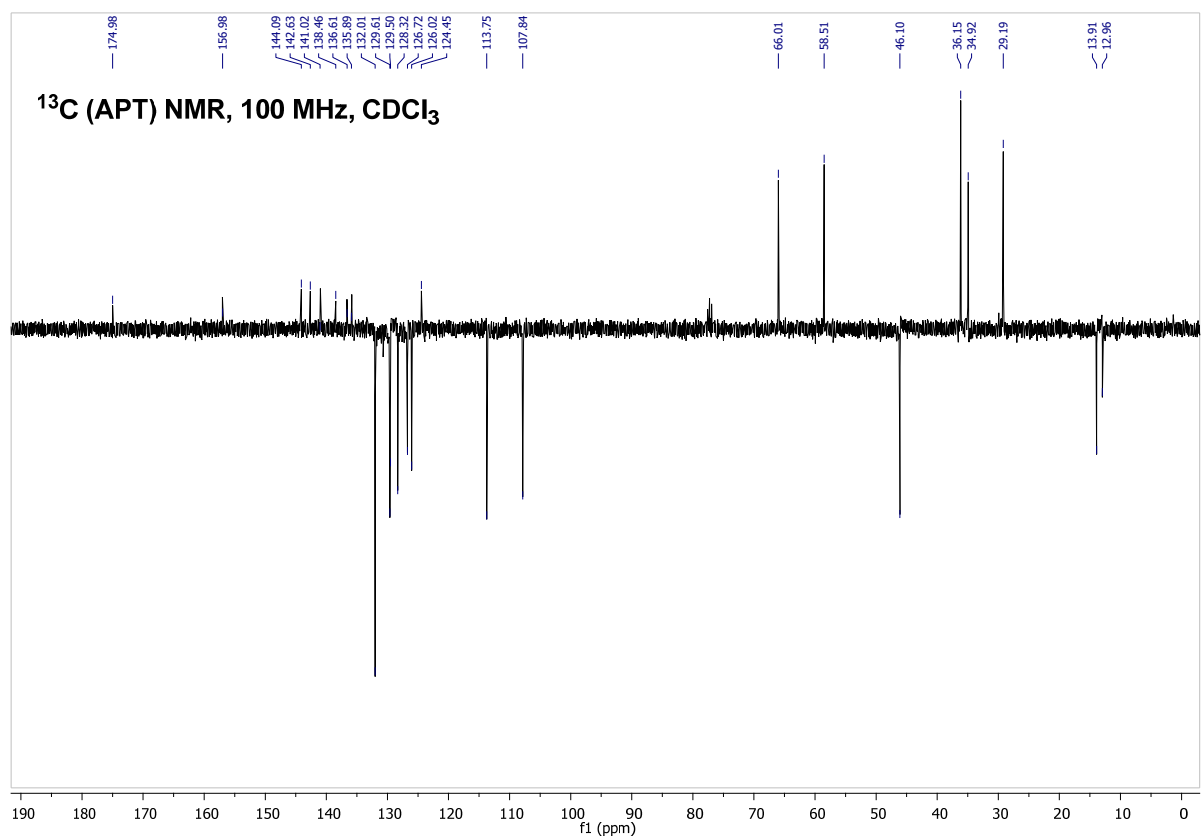

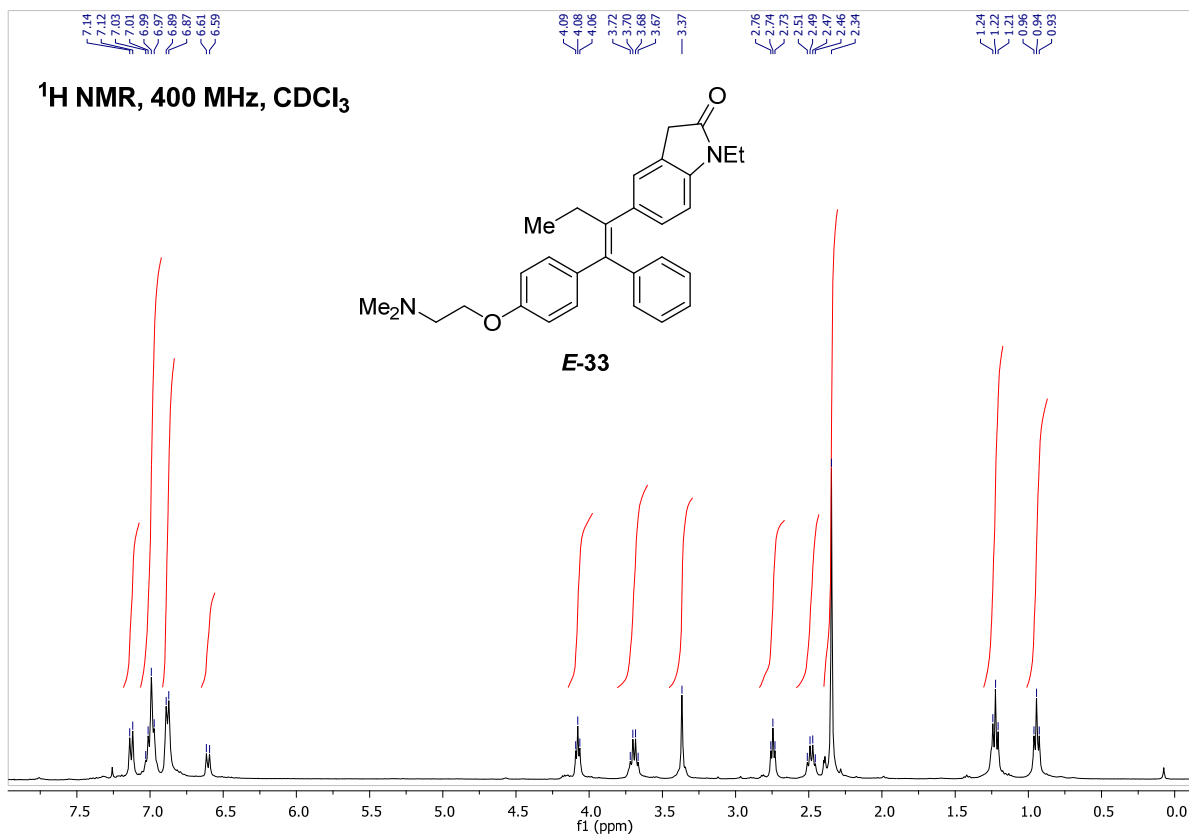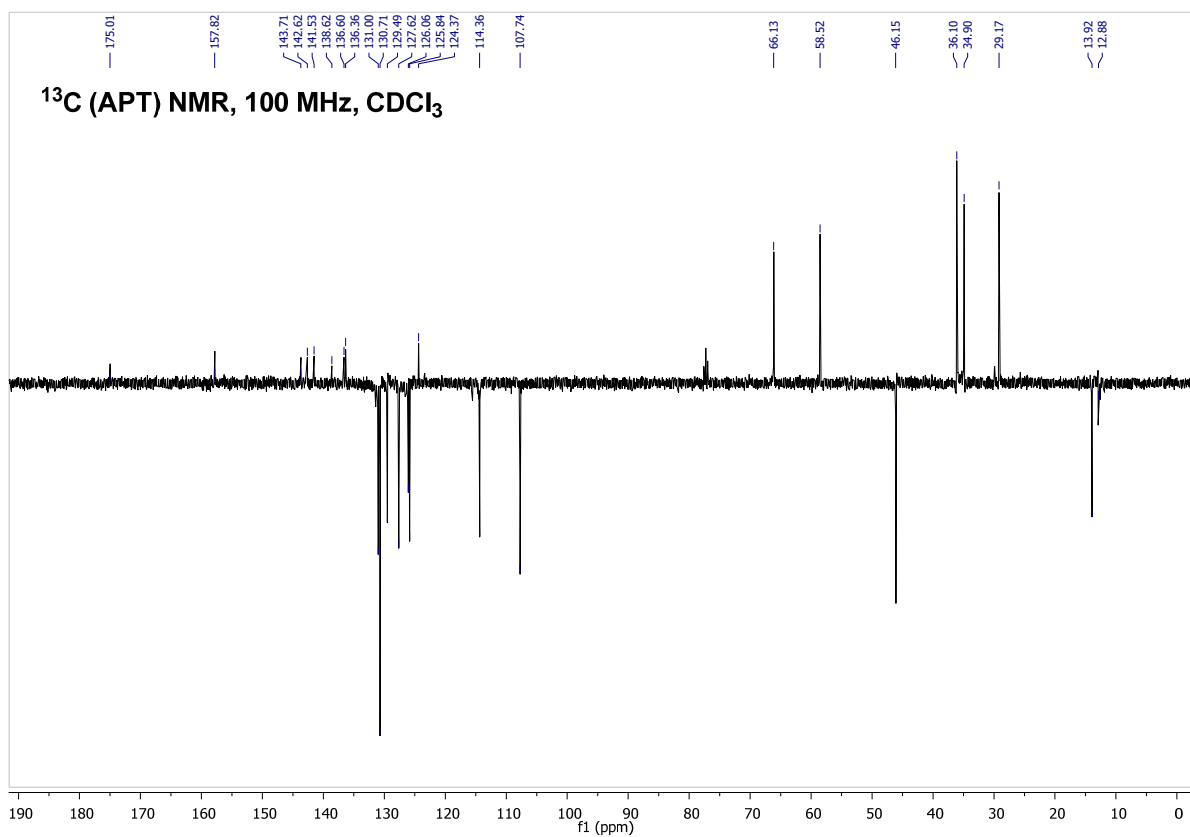

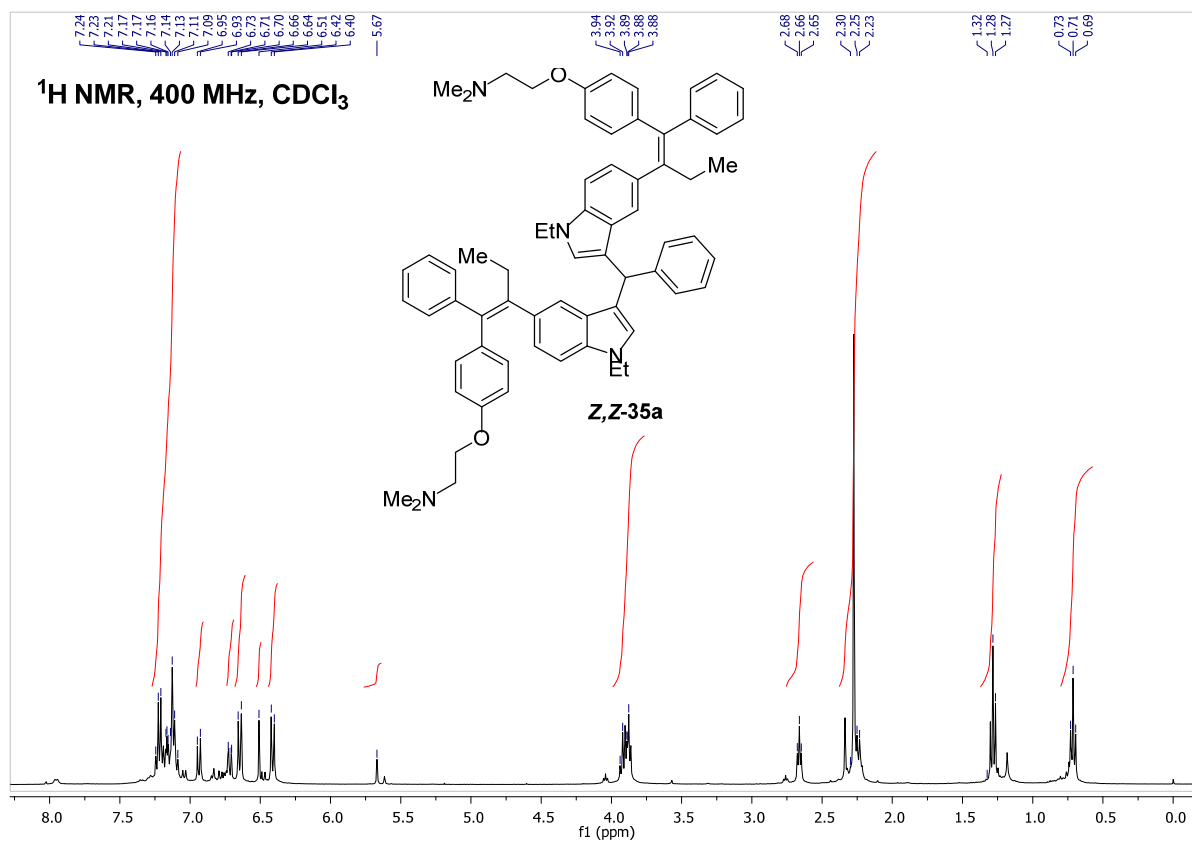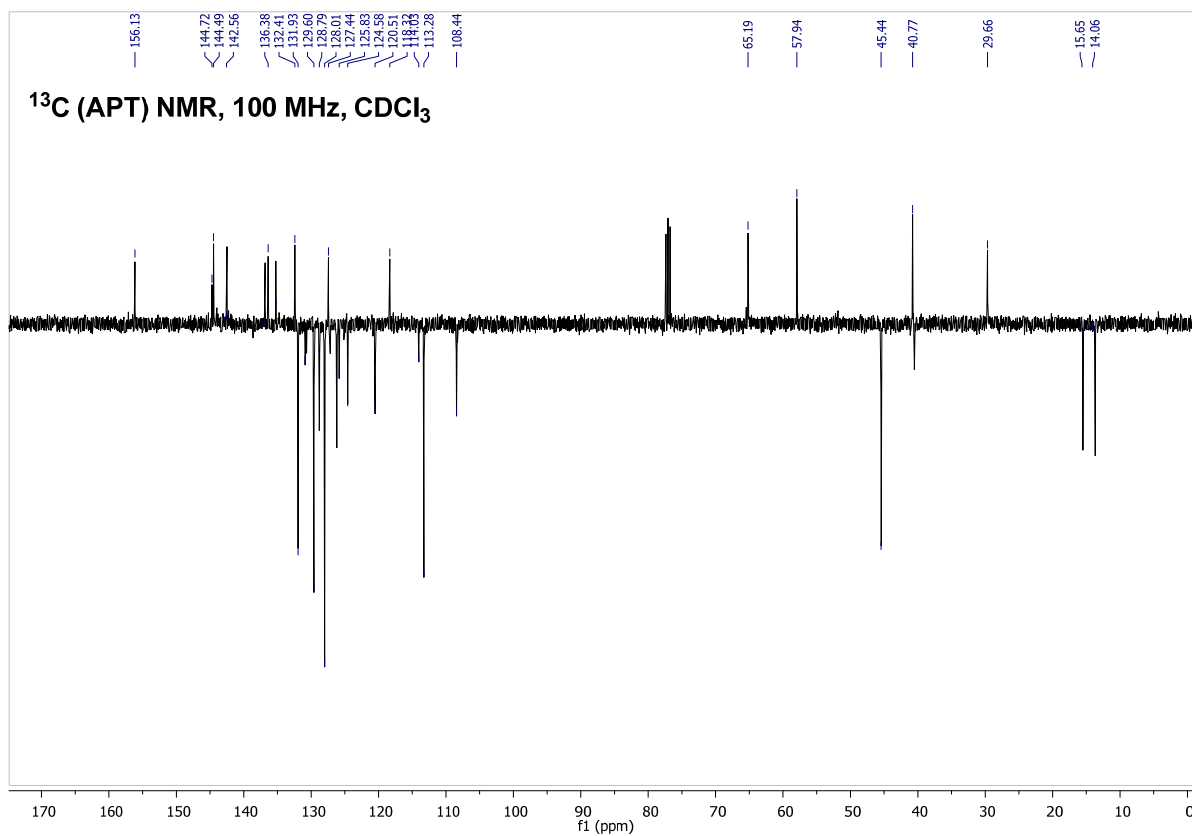

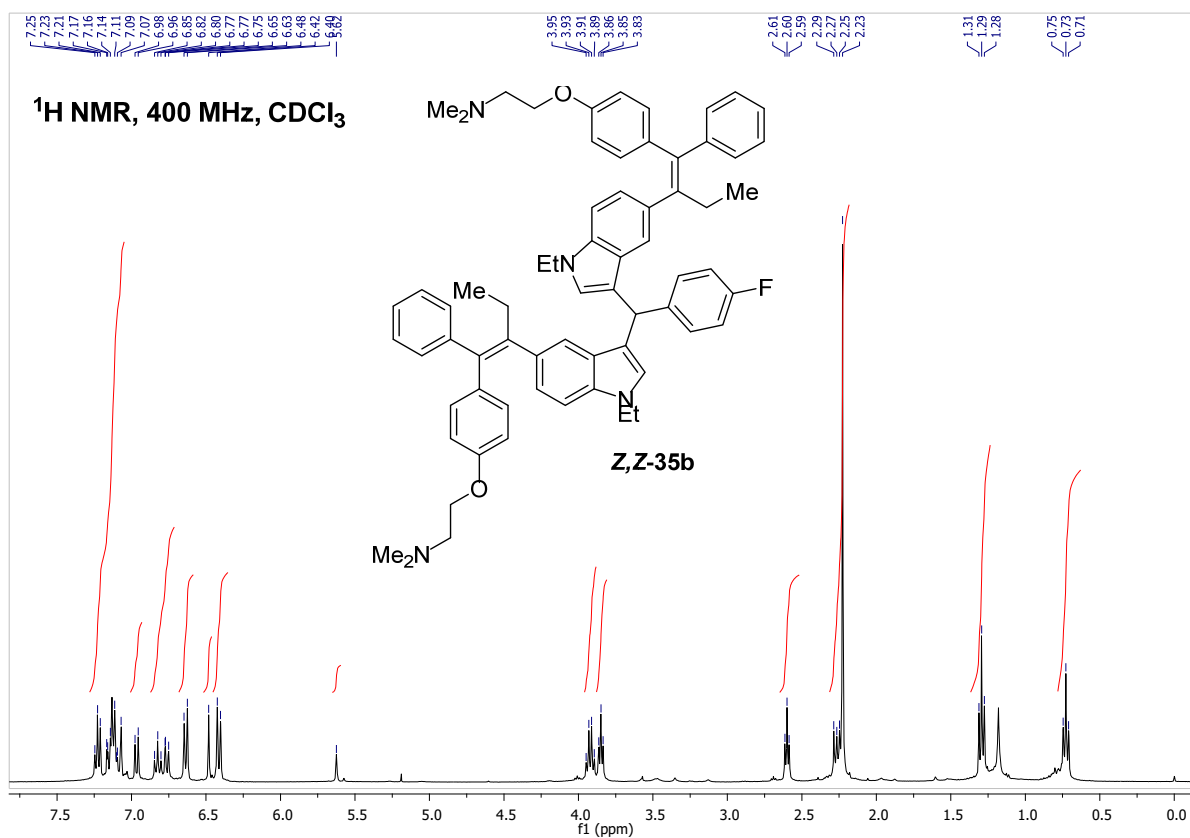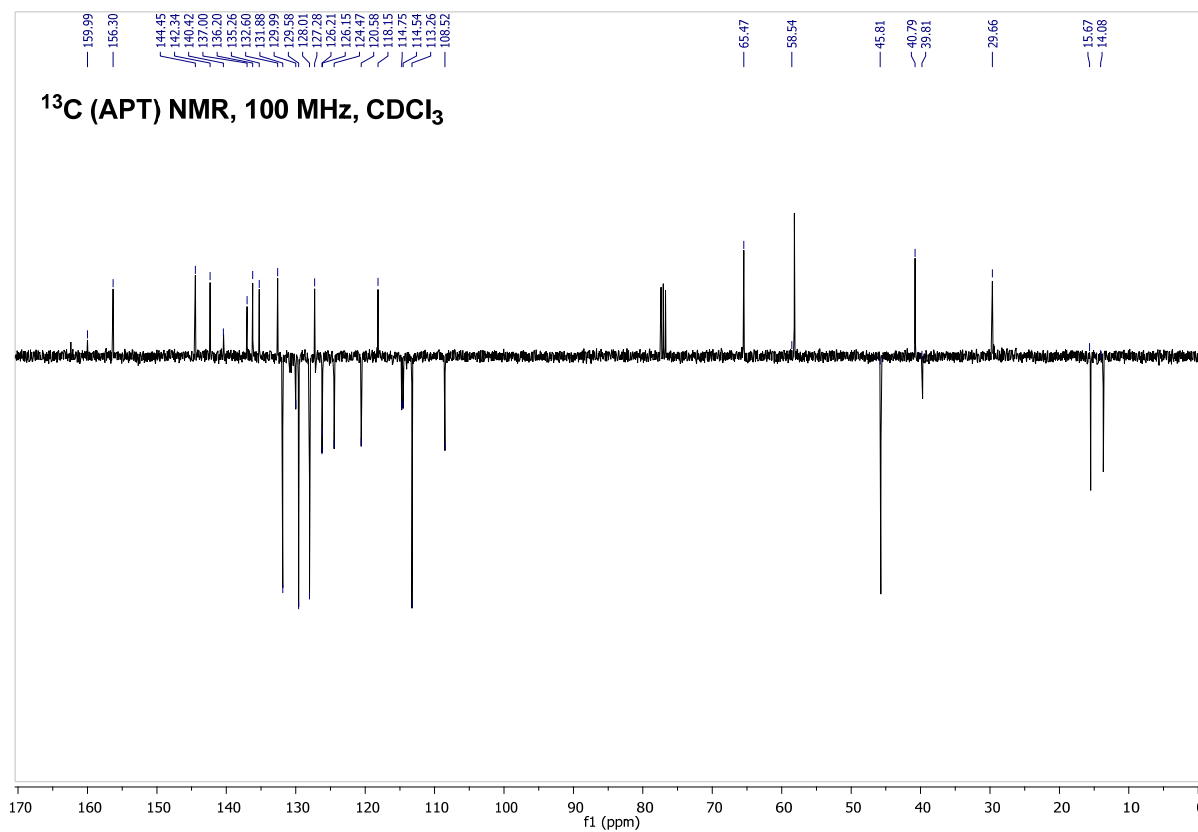

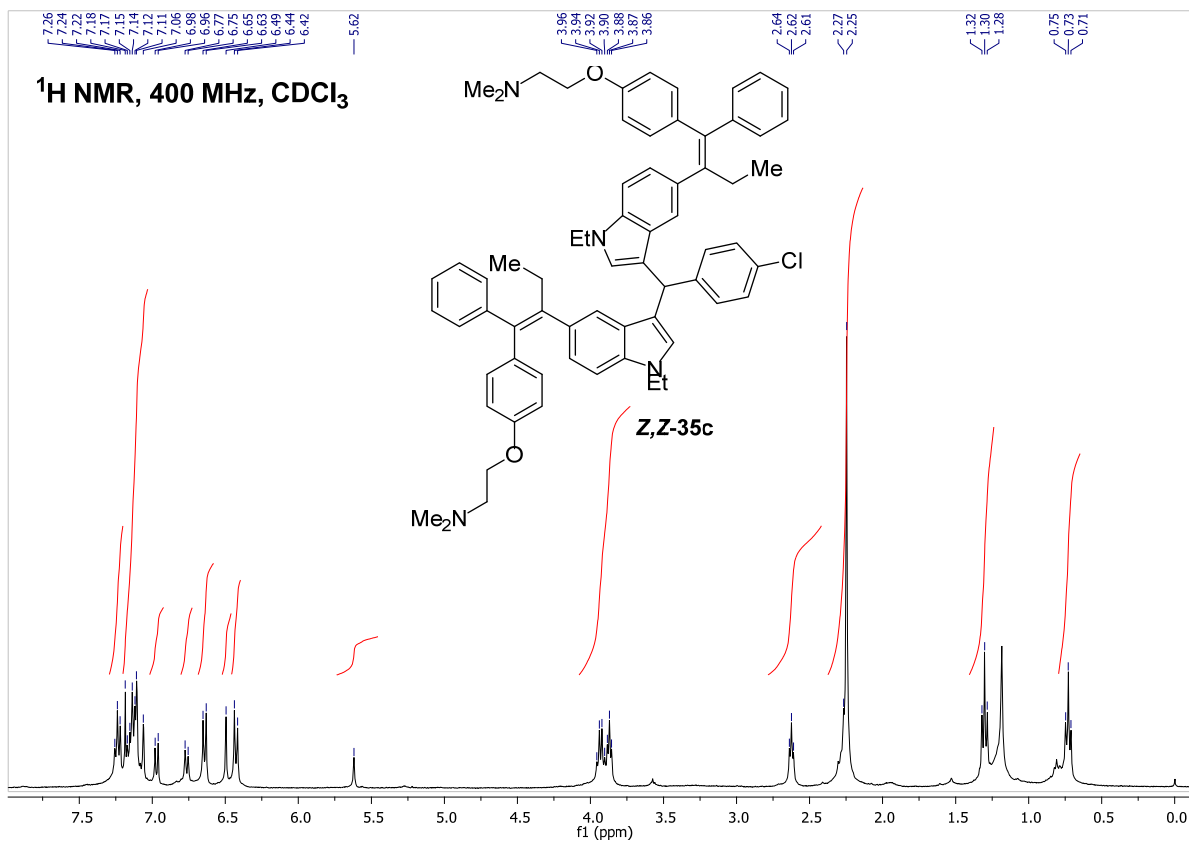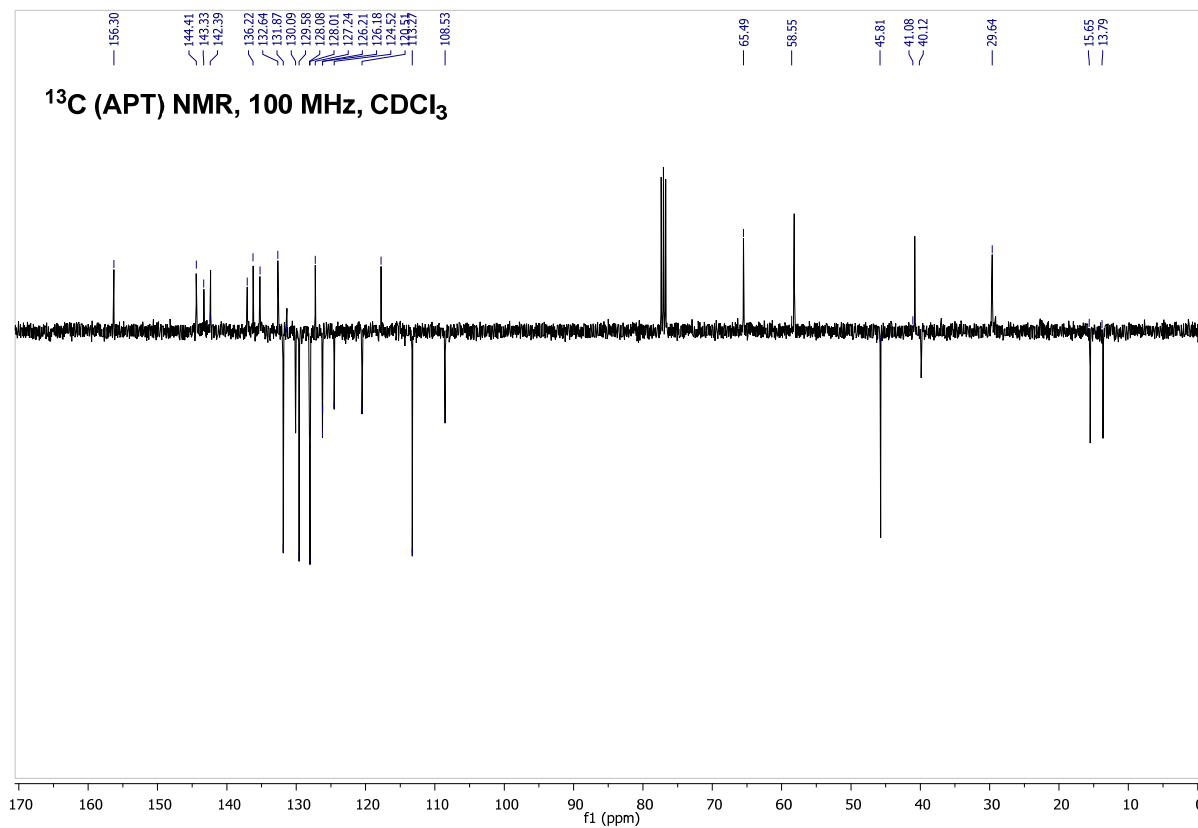

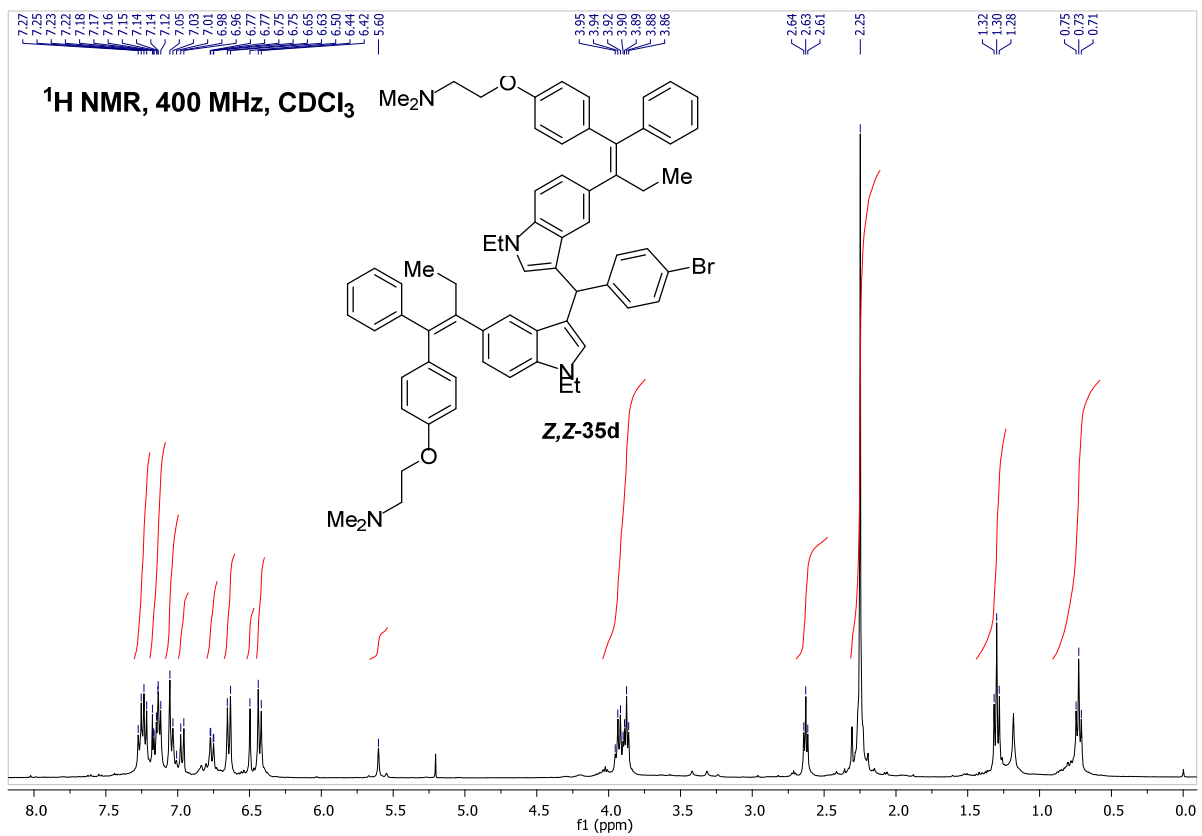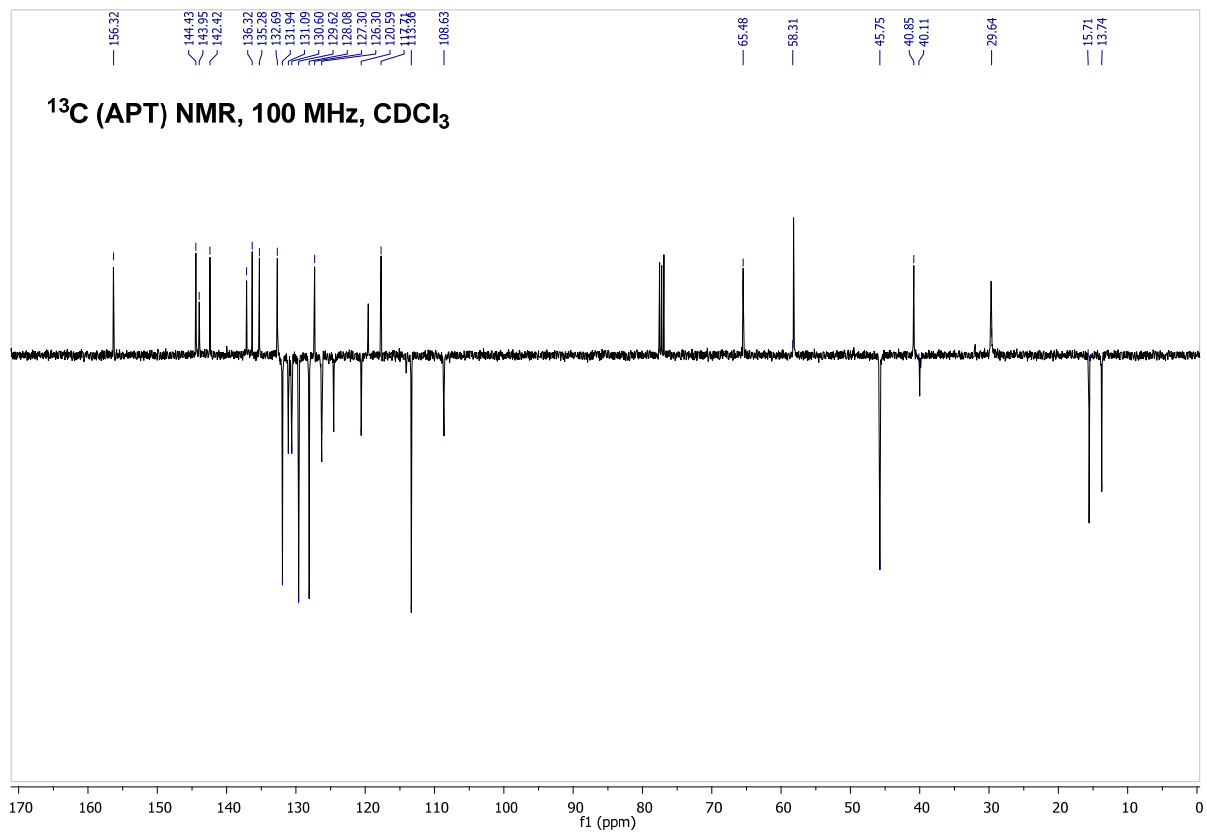



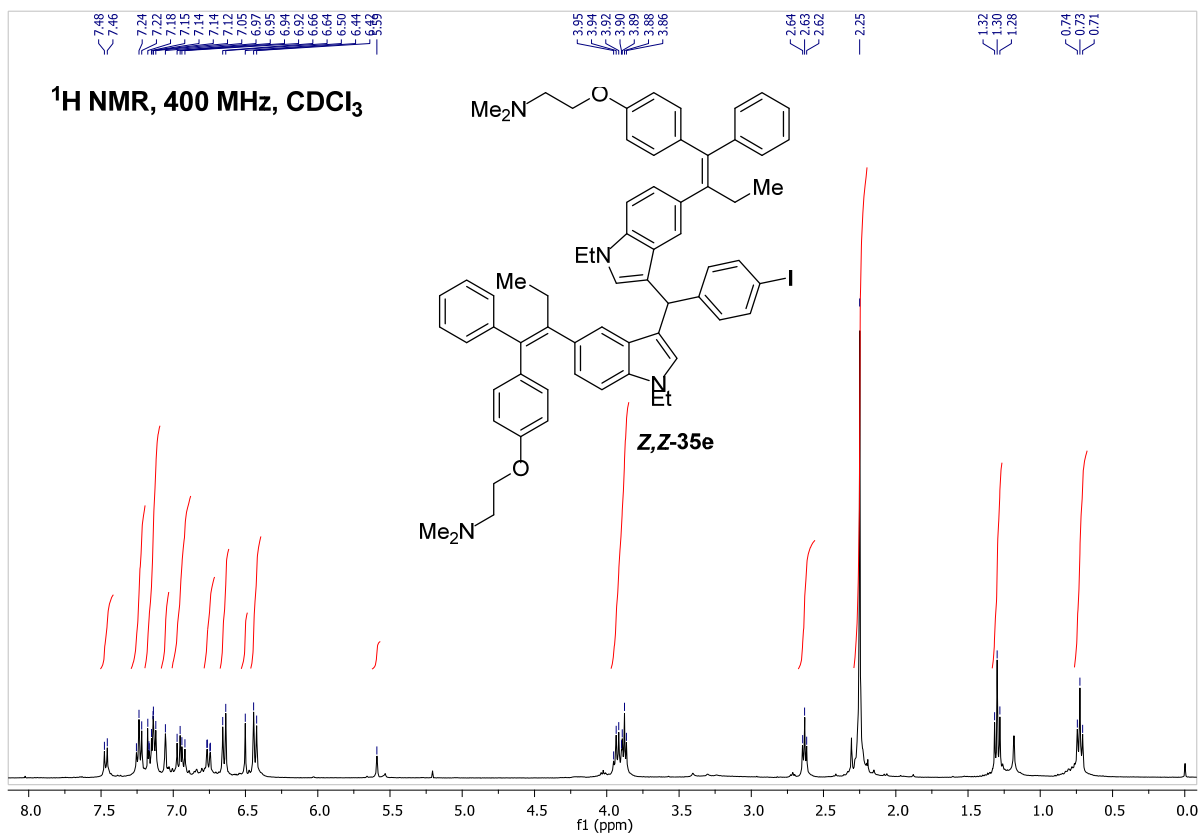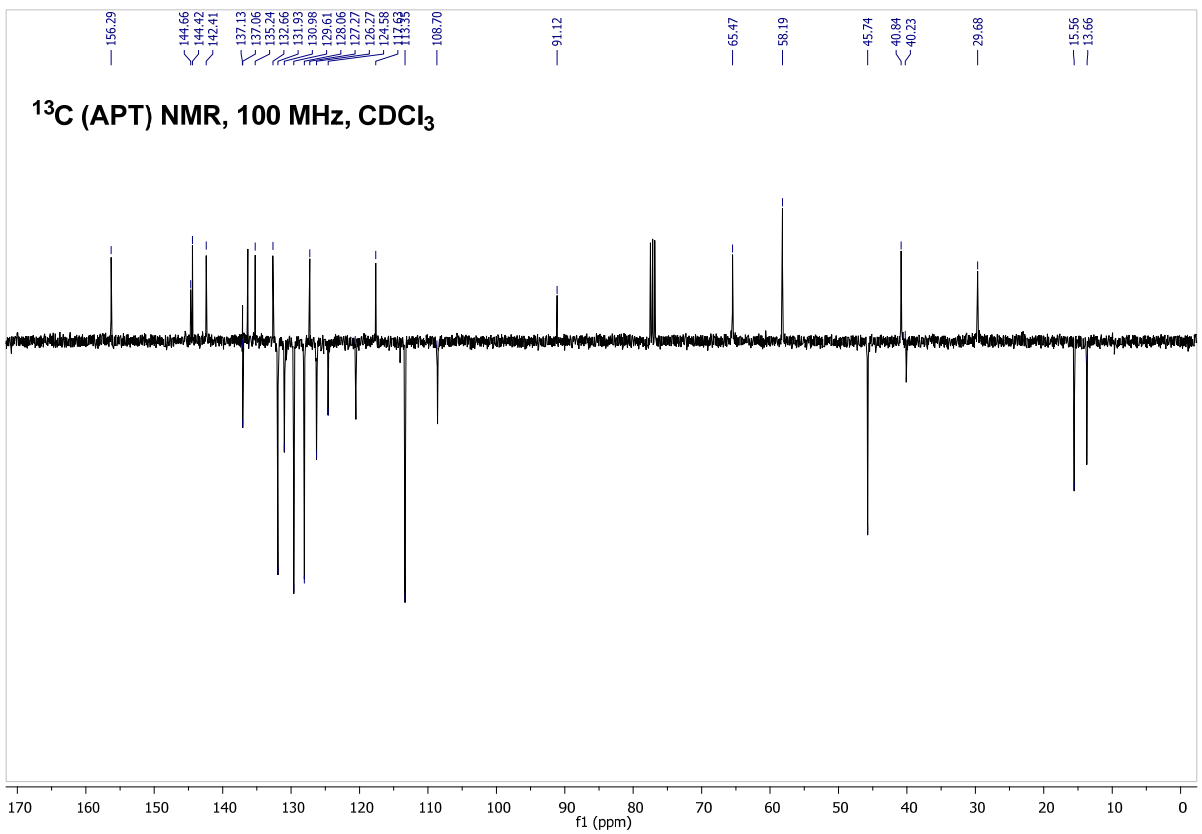

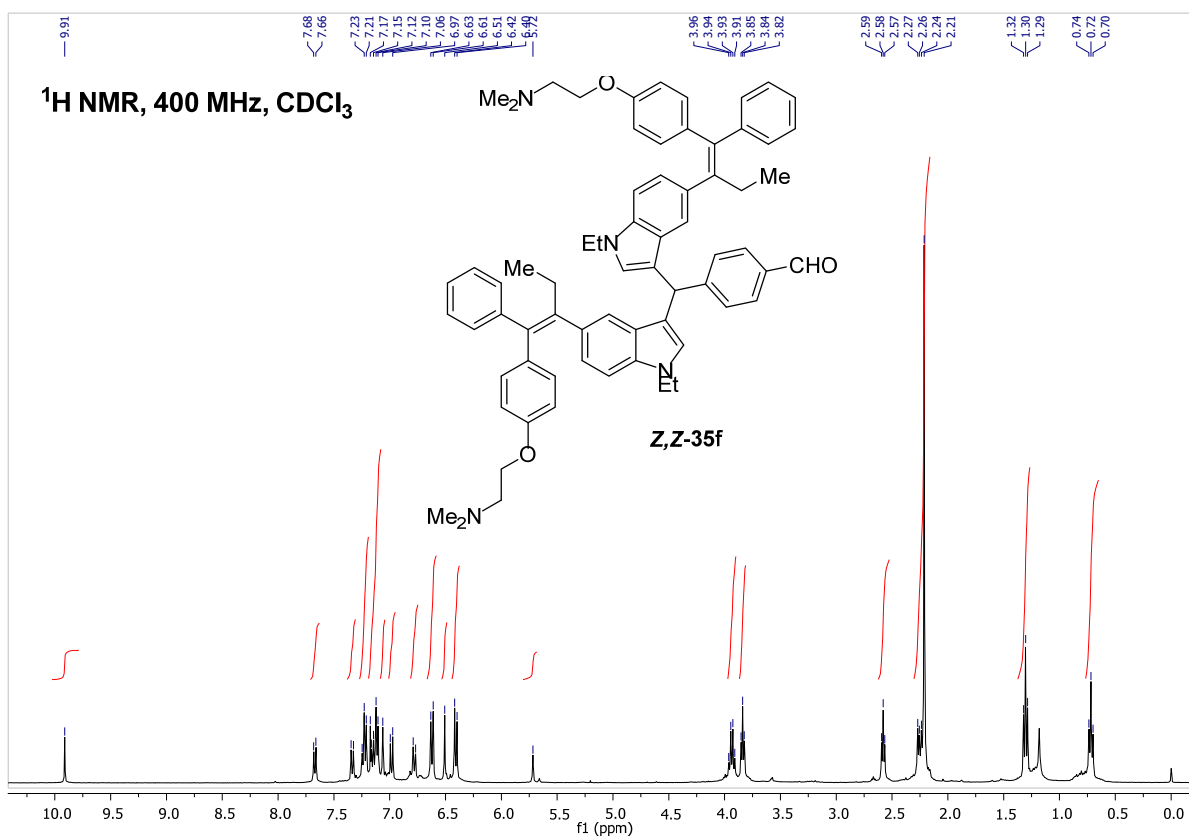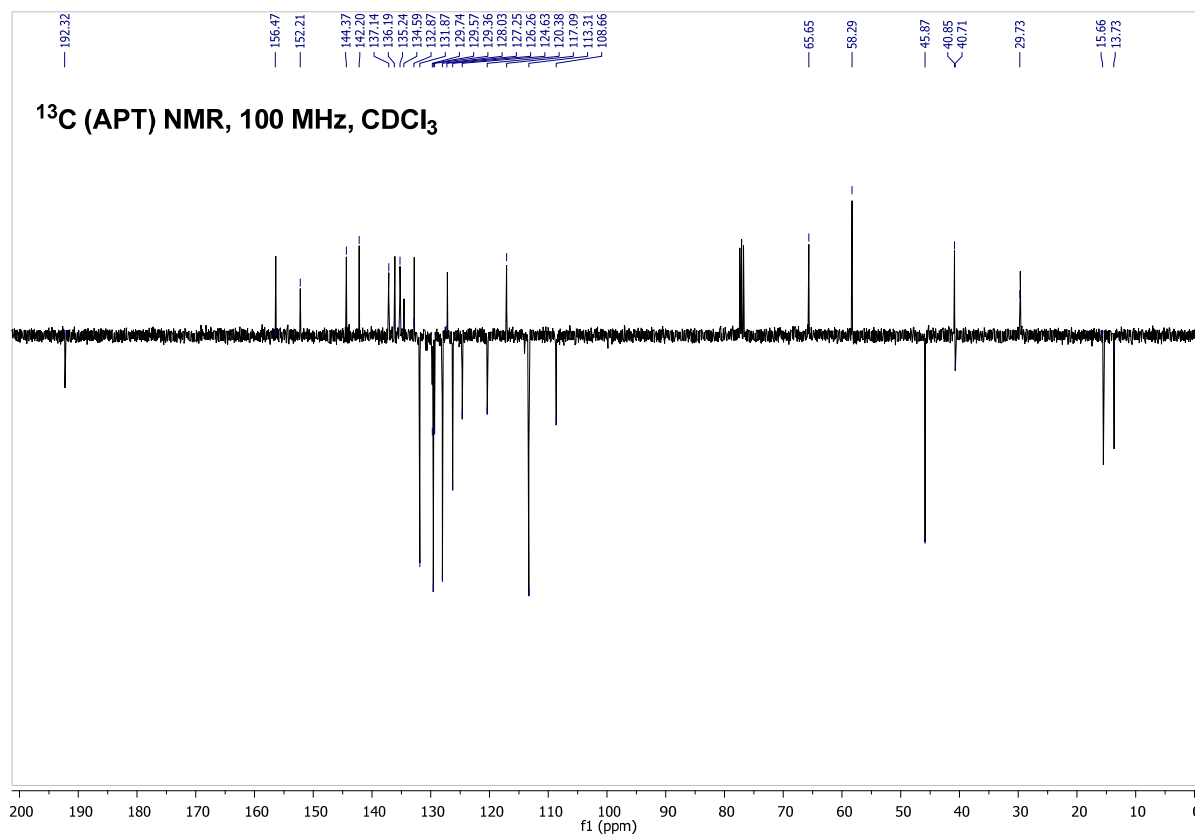

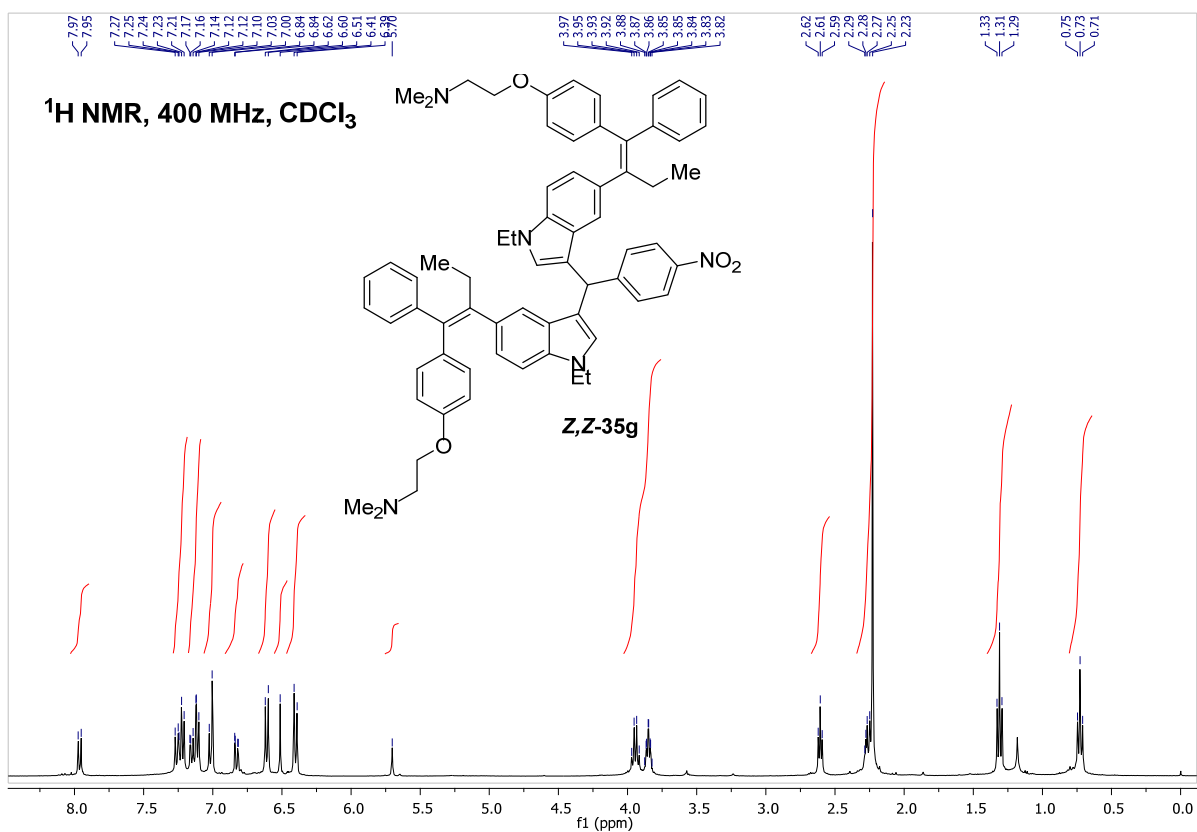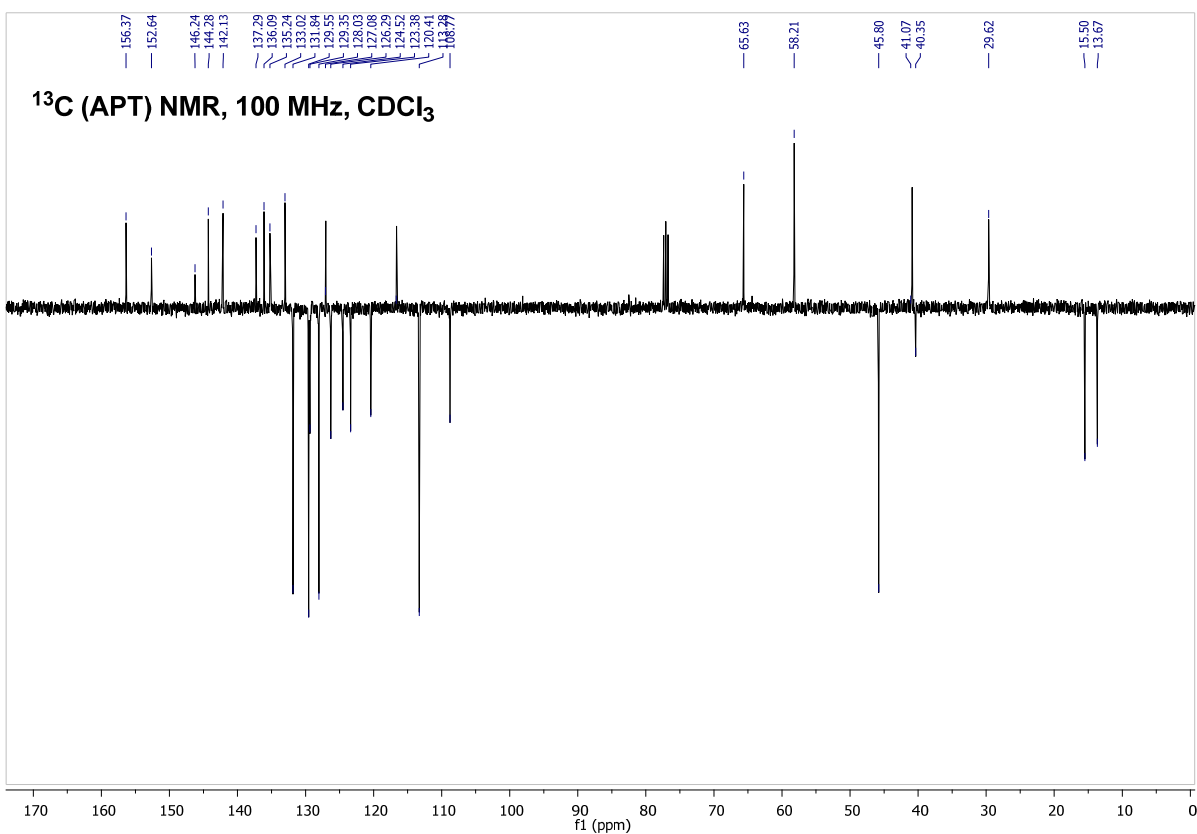

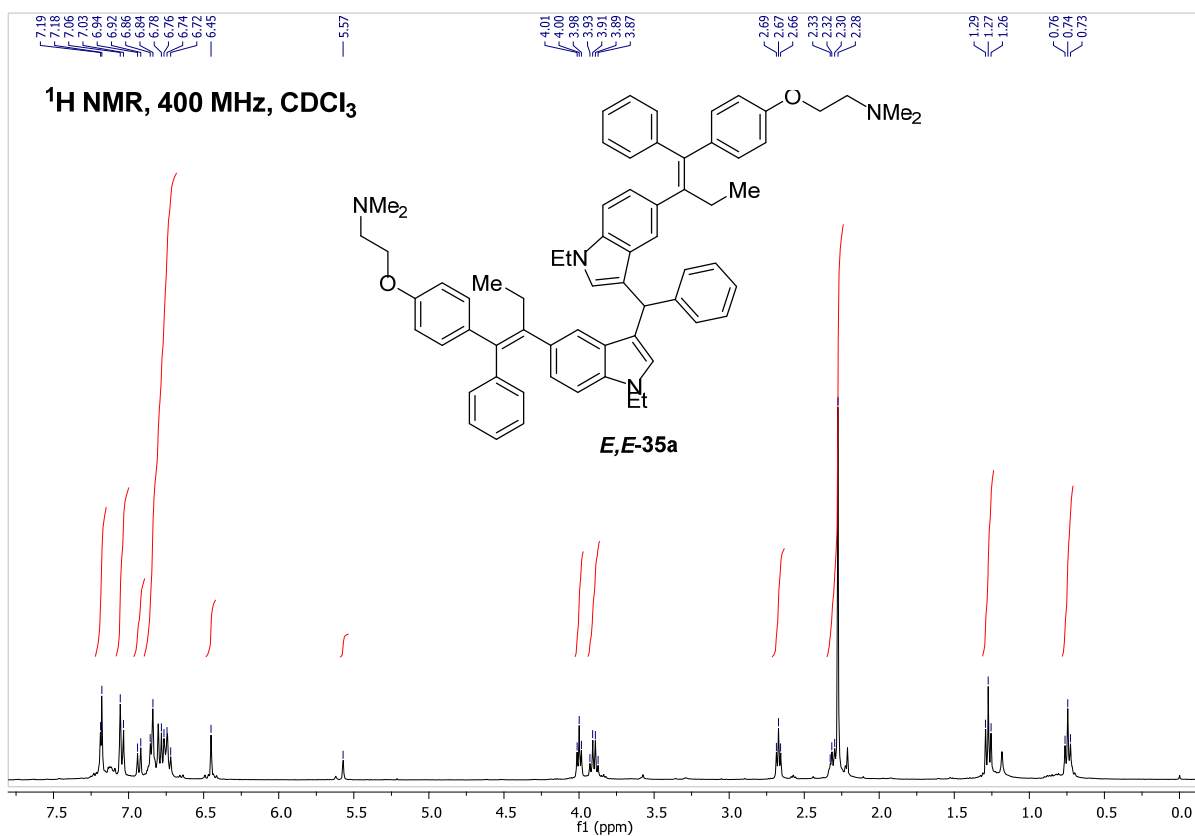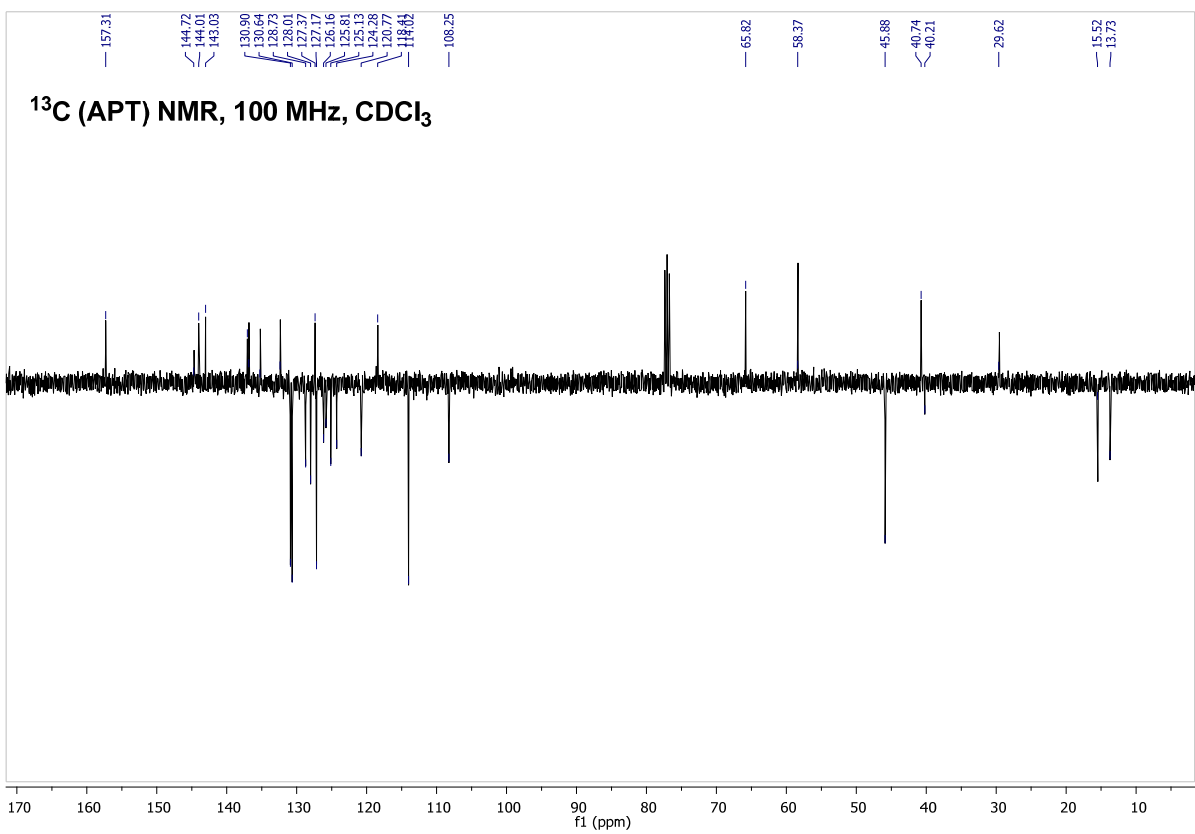

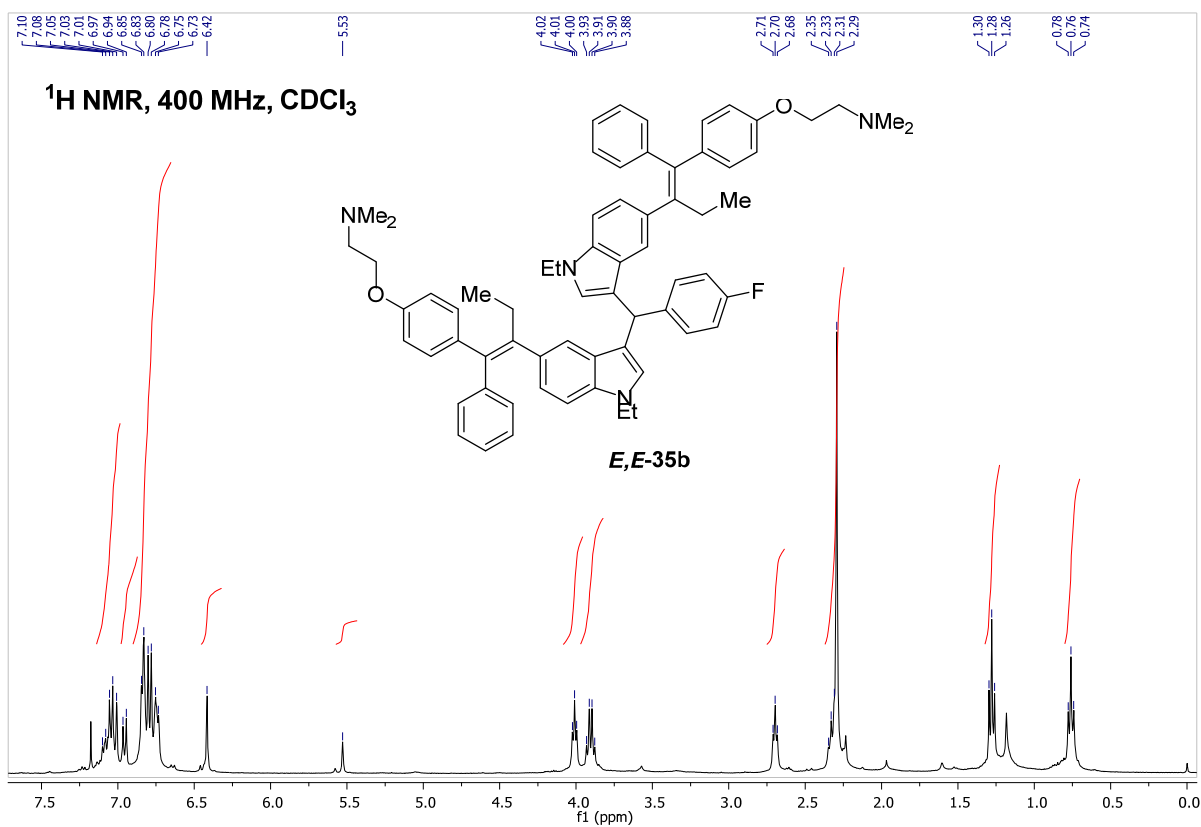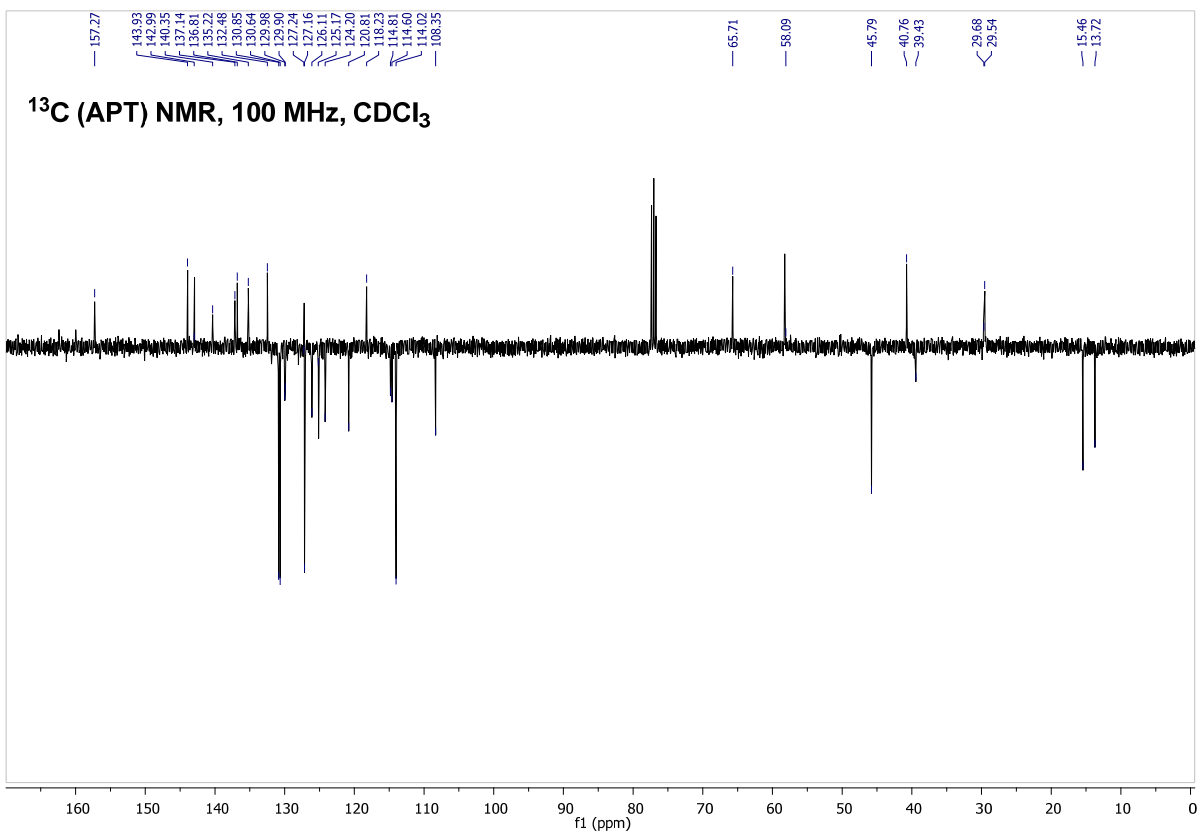

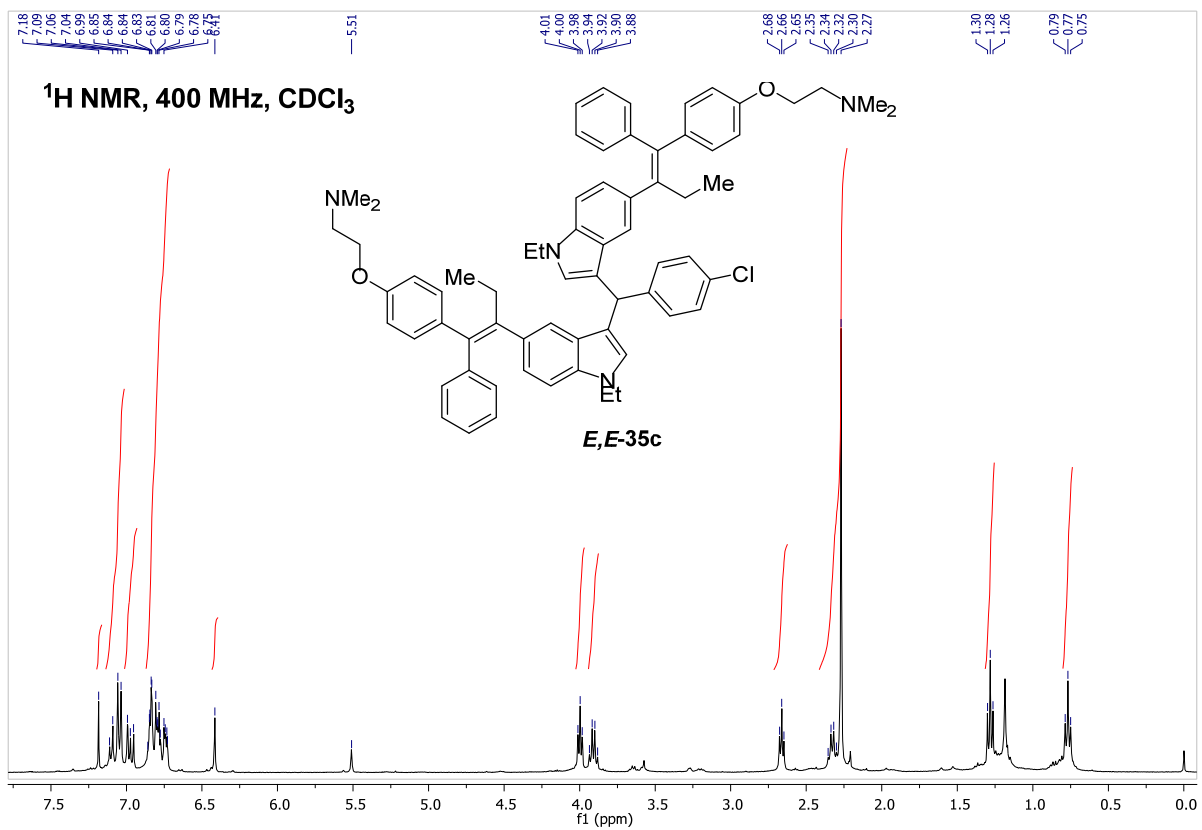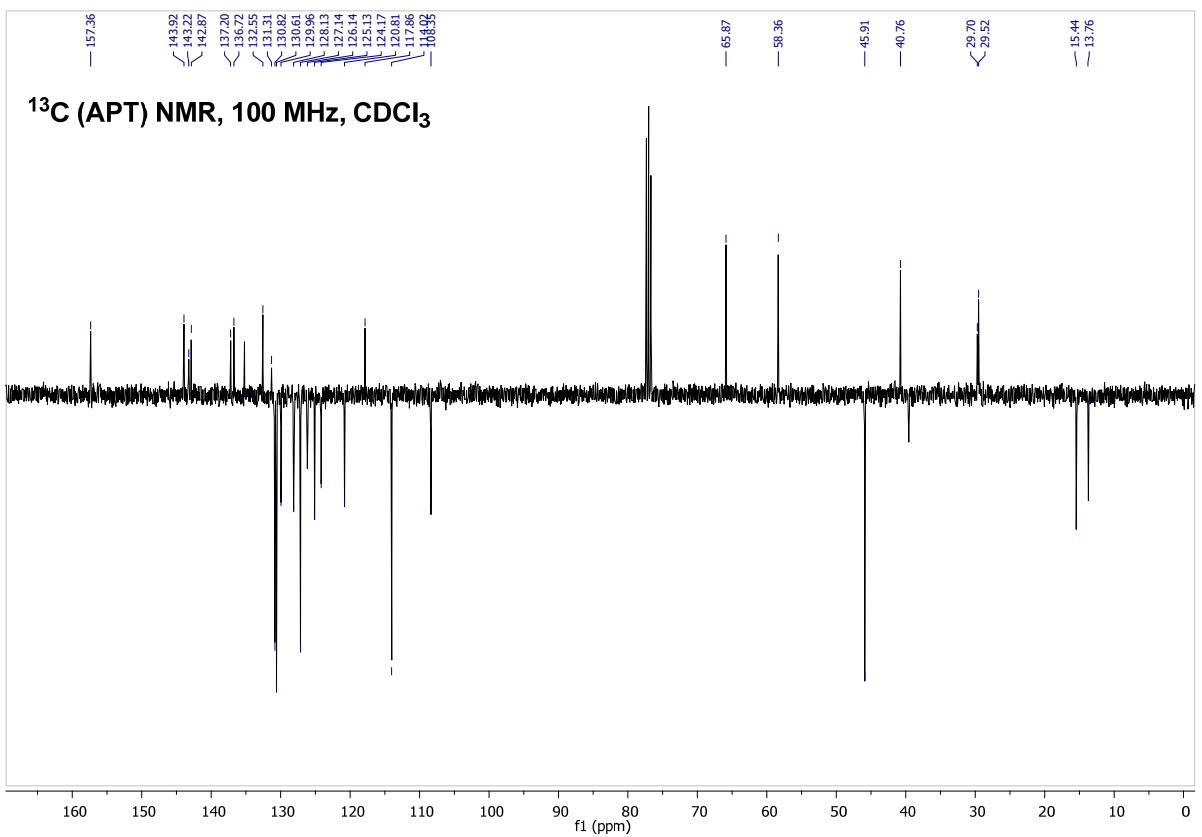

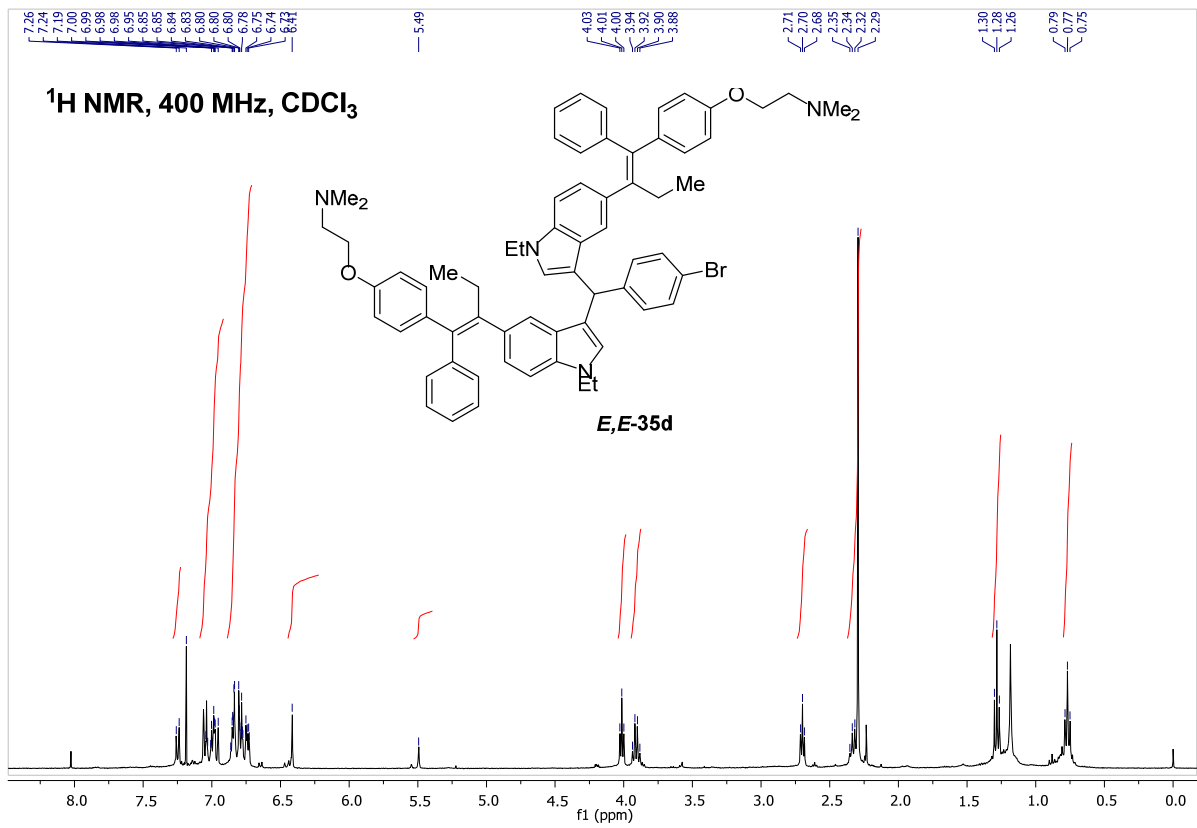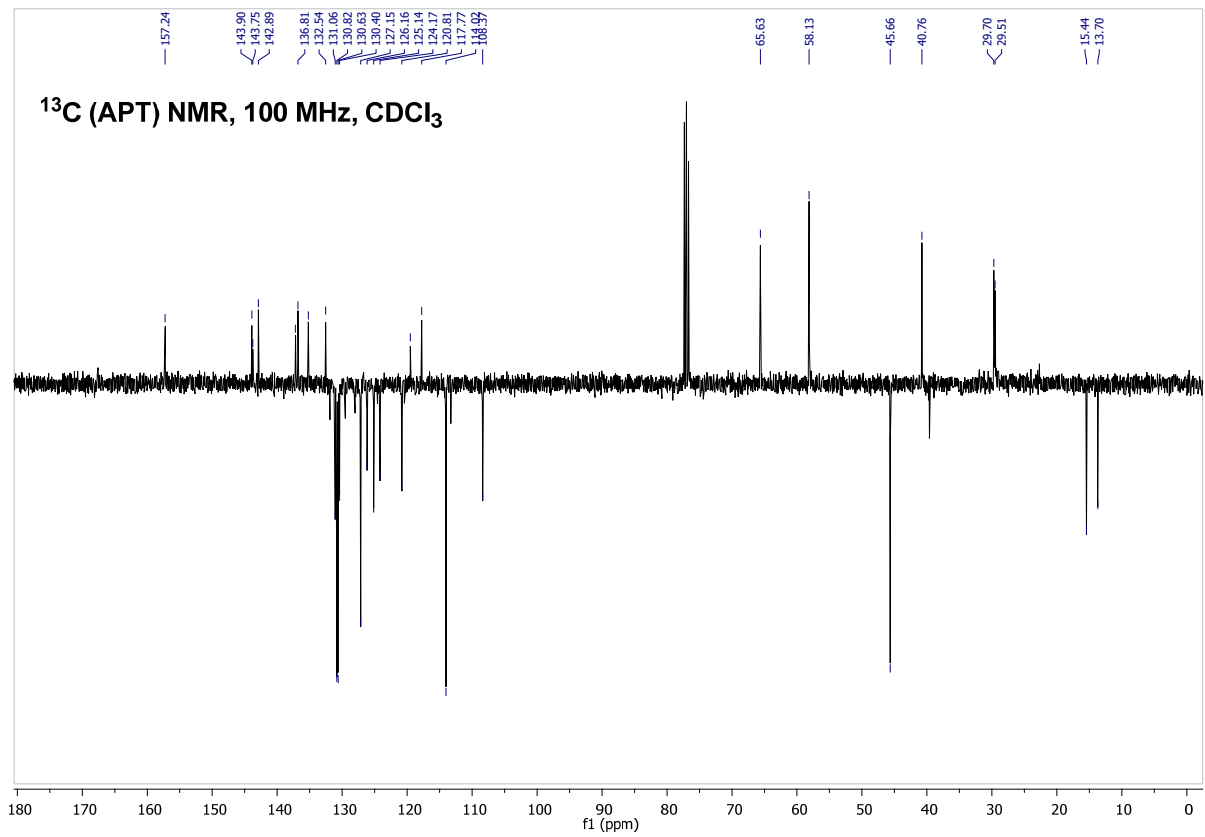

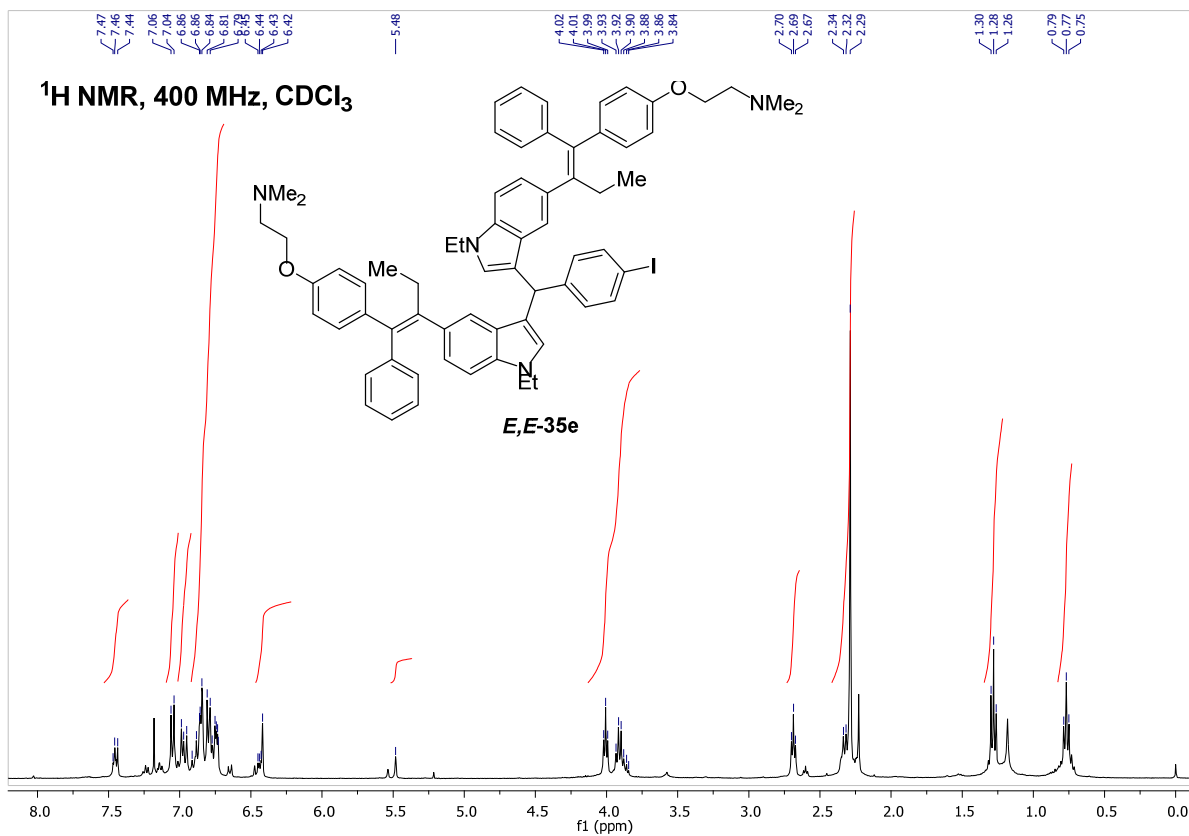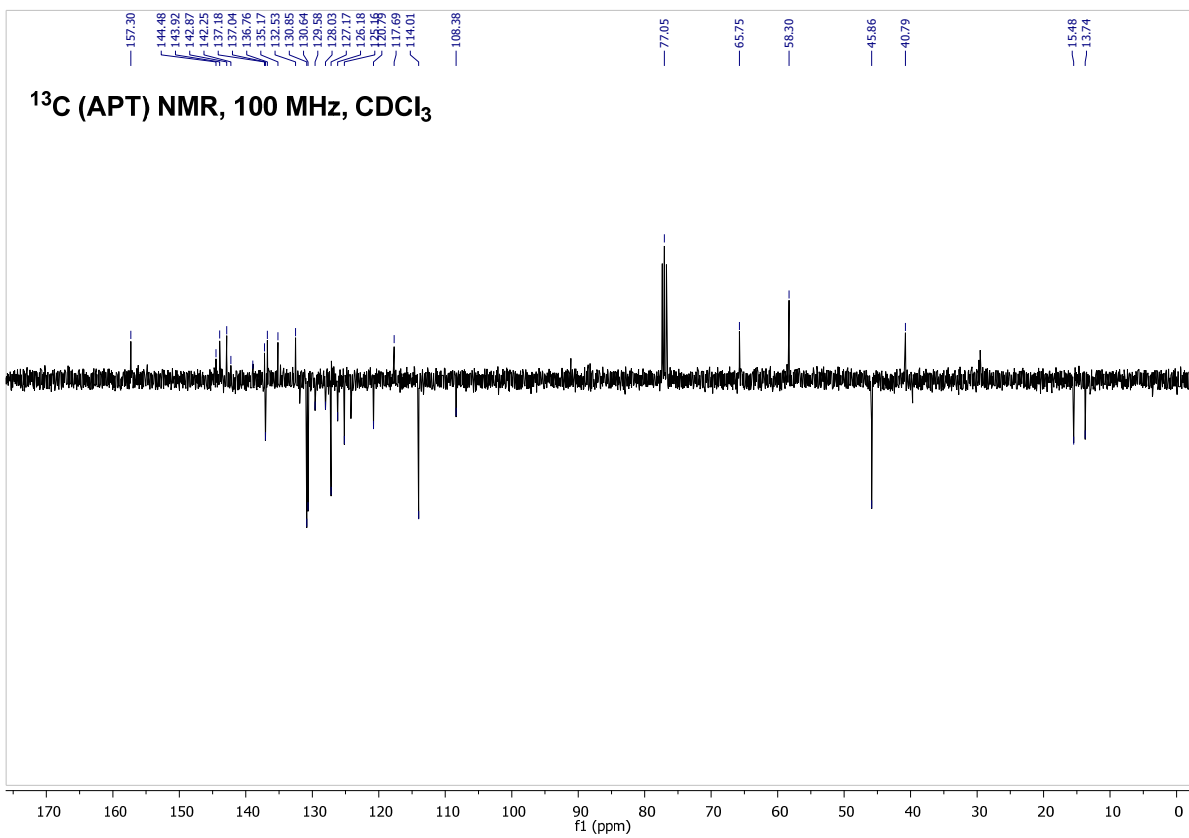



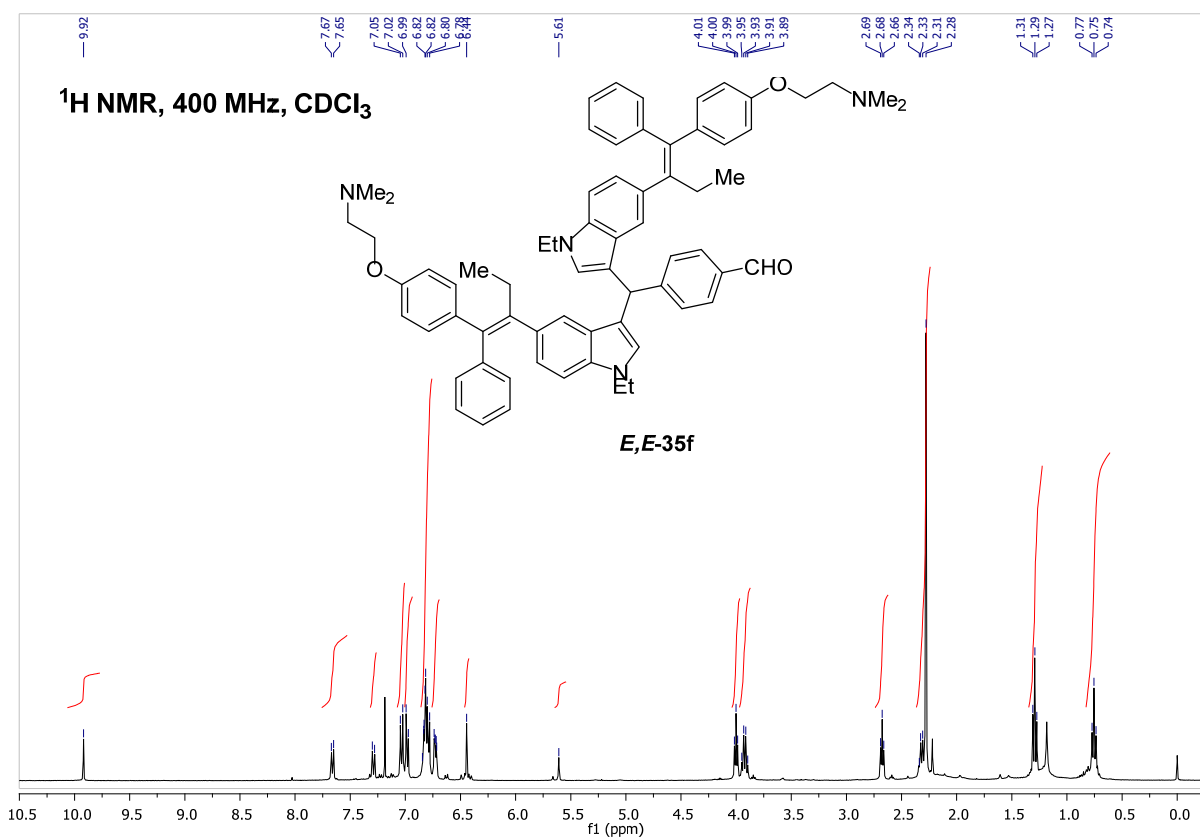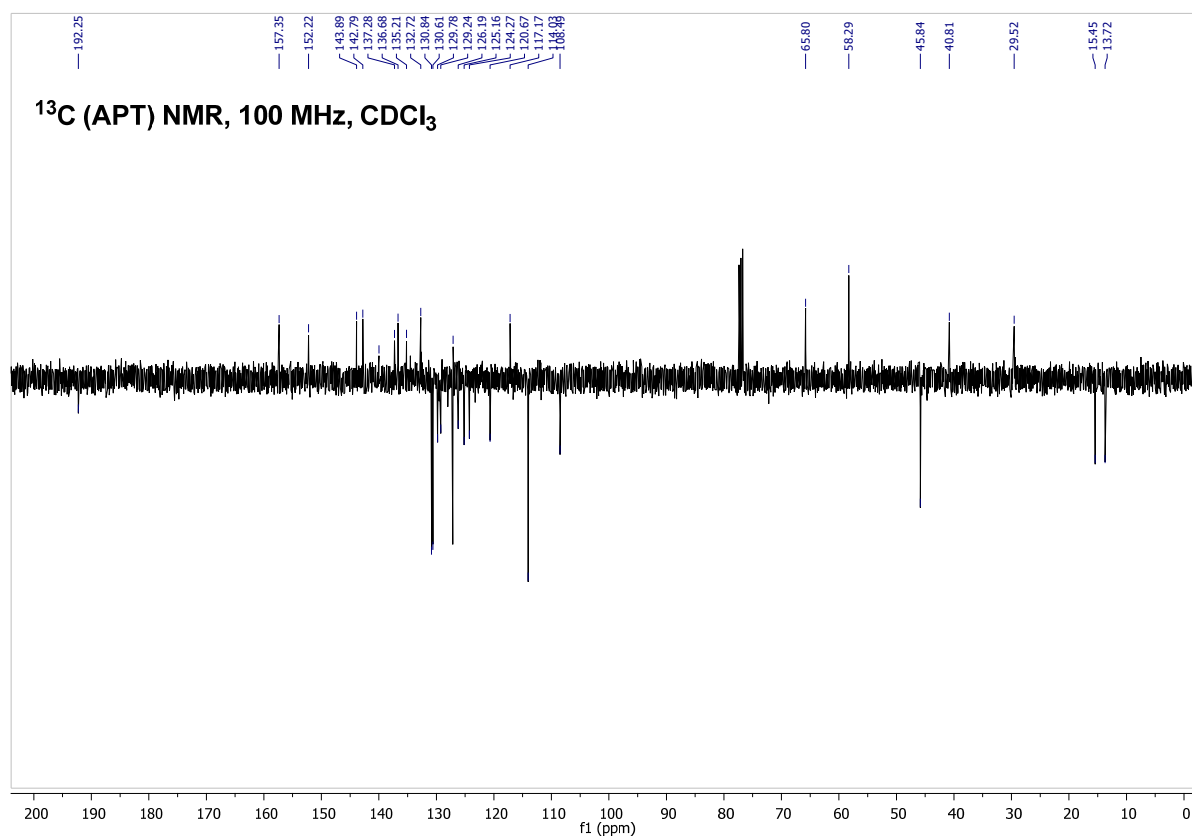

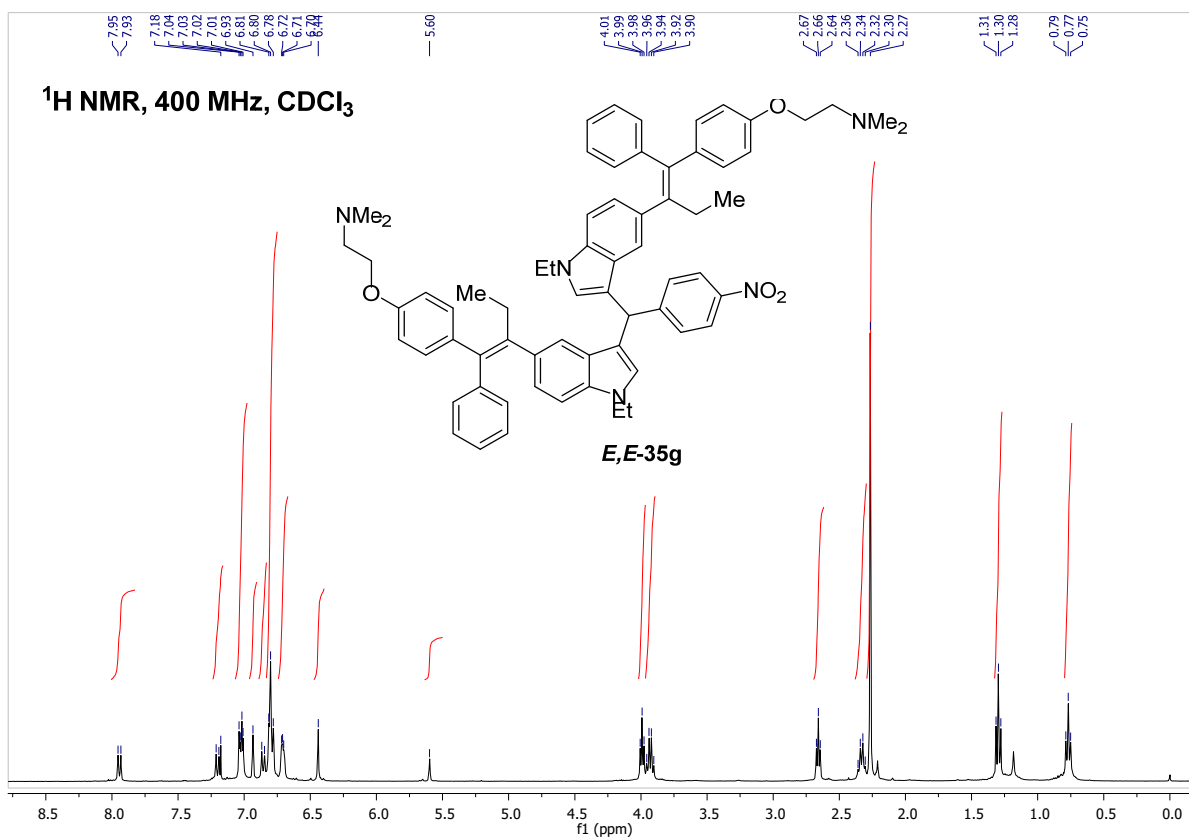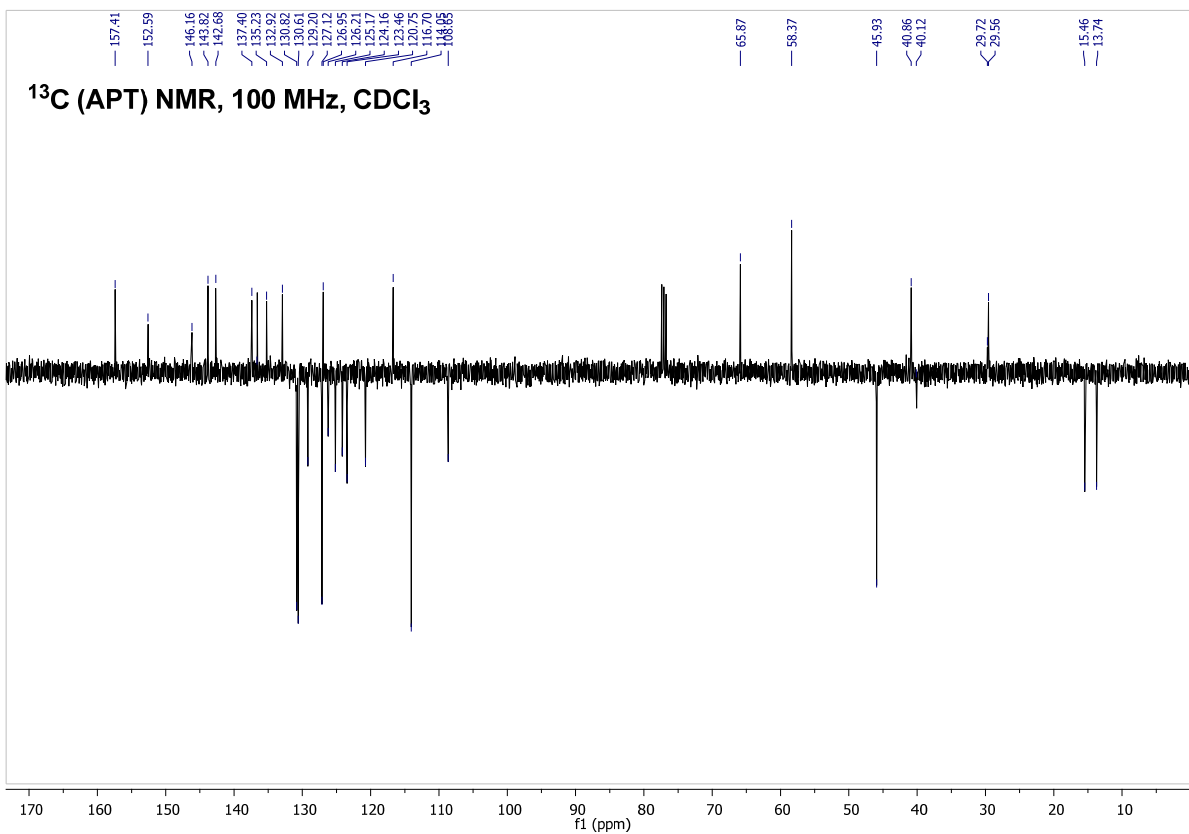

## HRMS spectra of compounds

### HRMS spectrum of *E*-26

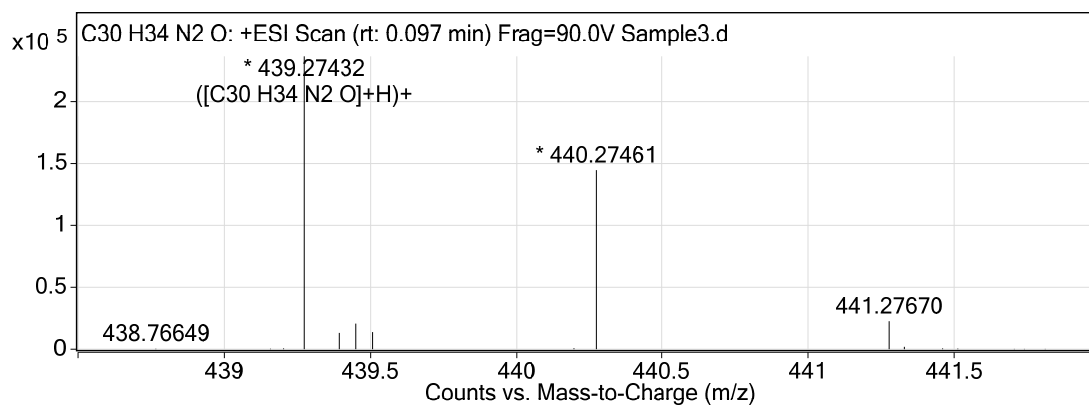

### HRMS spectrum of *Z*-26

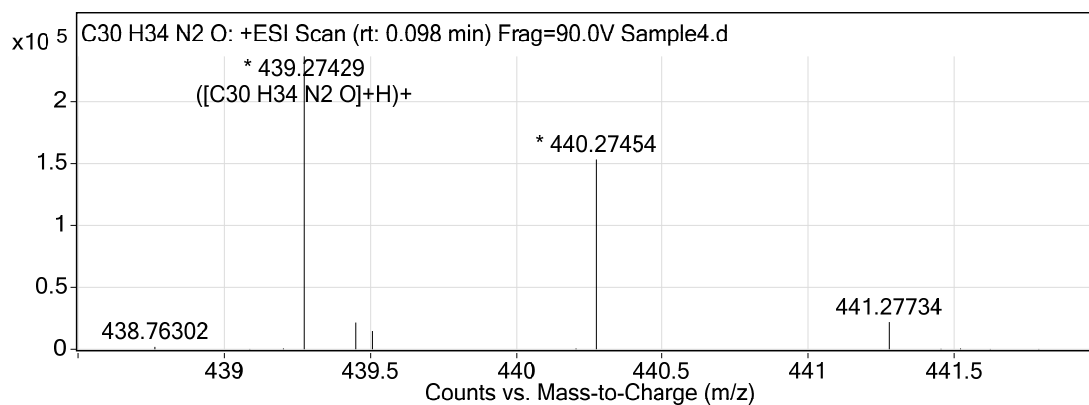

### HRMS spectrum of *E*-33

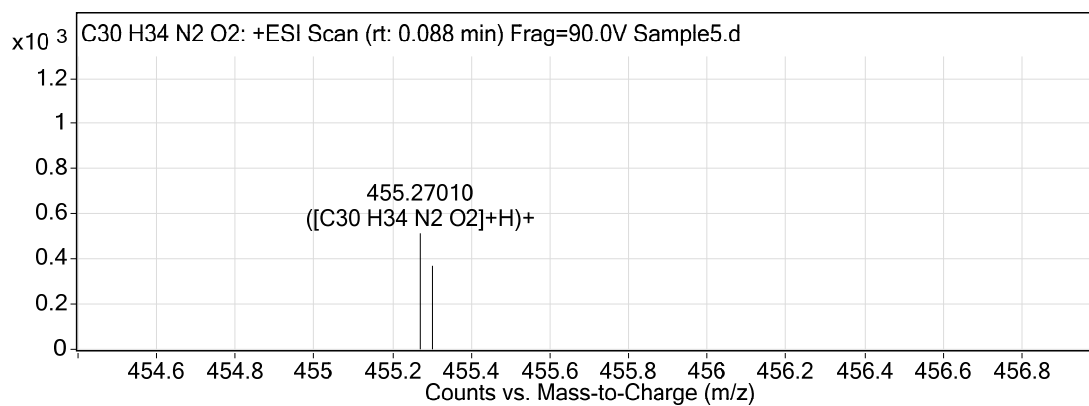

### HRMS spectrum of **Z-33**

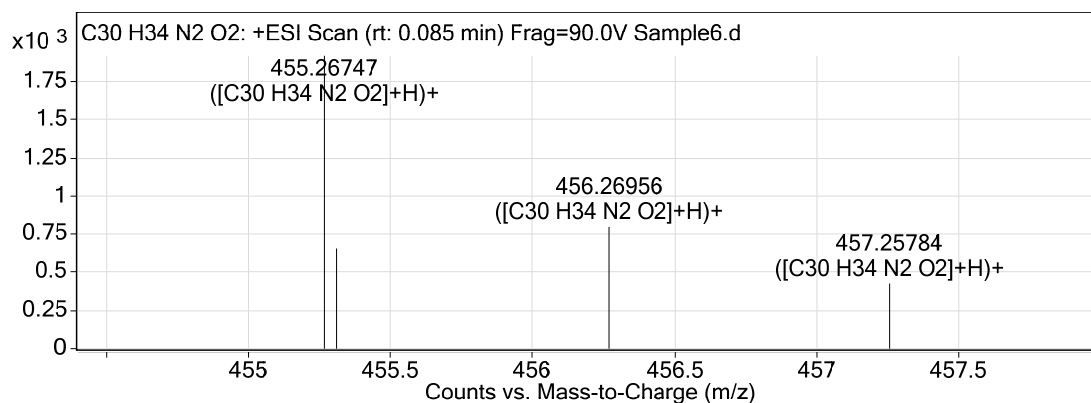

### HRMS spectrum of **Z,Z-35a**

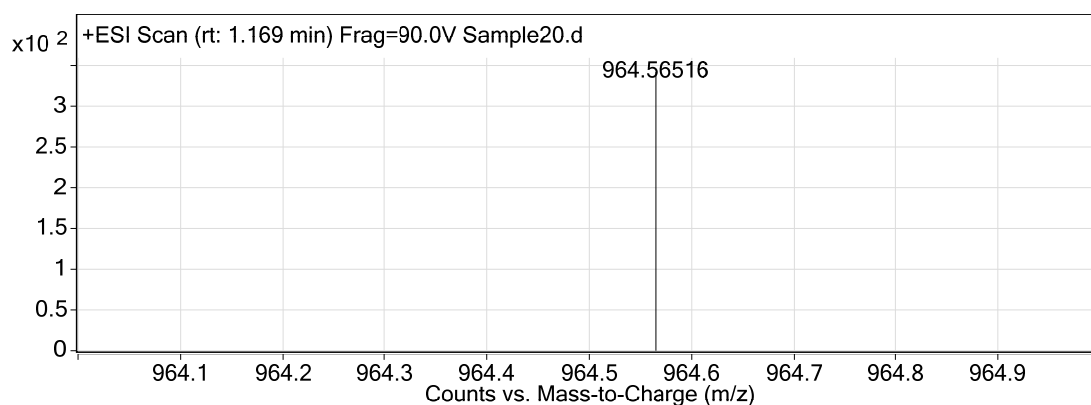

### HRMS spectrum of **Z,Z-35b**

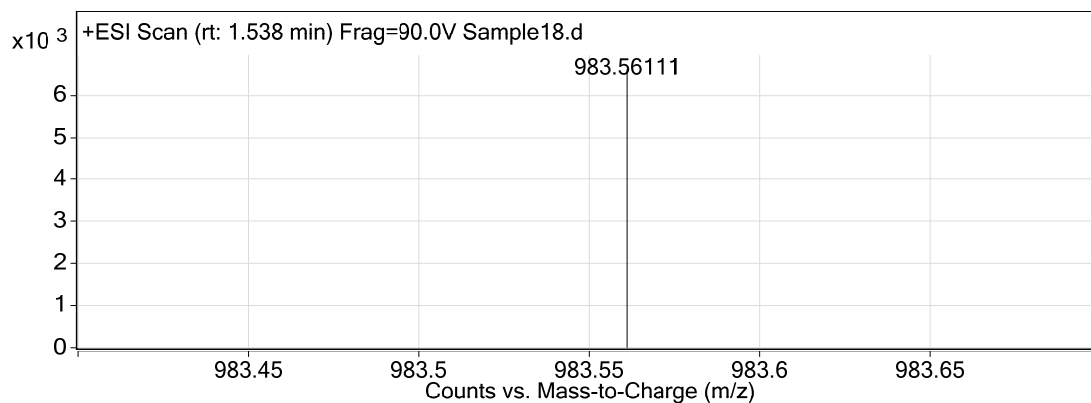

### HRMS spectrum of **Z,Z-35c**

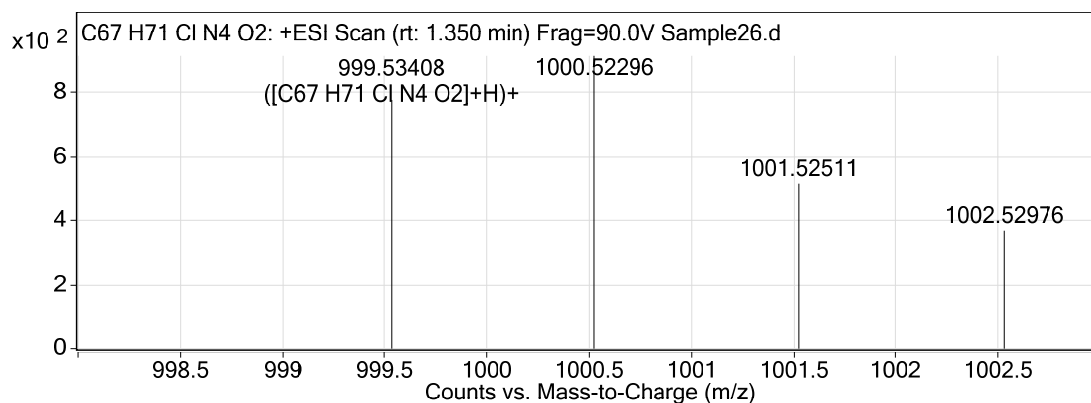

### HRMS spectrum of **Z,Z-35d**

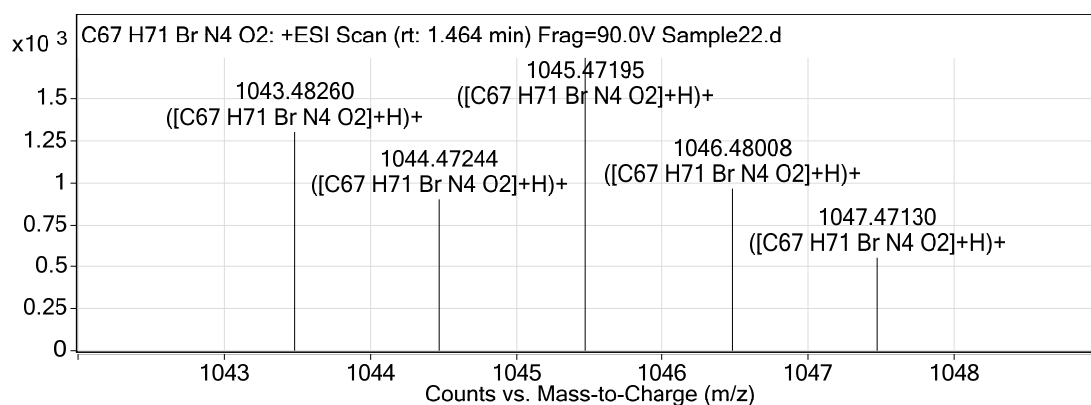

### HRMS spectrum of **Z,Z-35e**

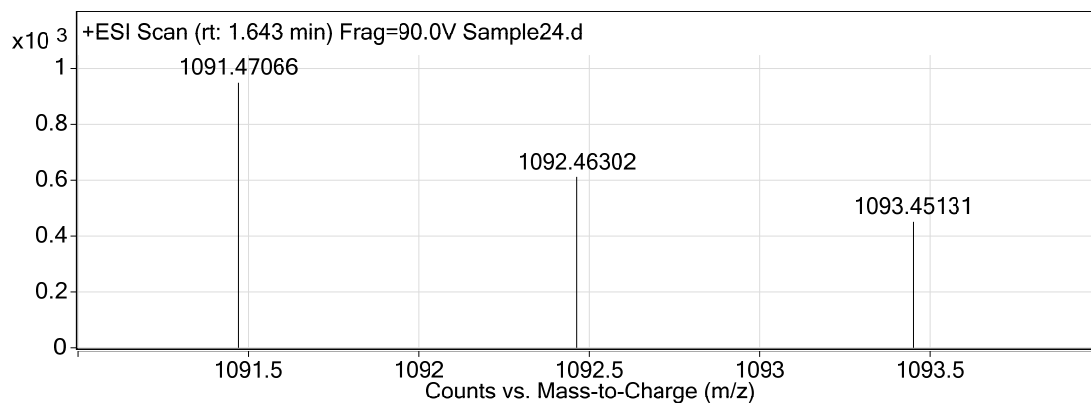

### HRMS spectrum of **Z,Z-35f**

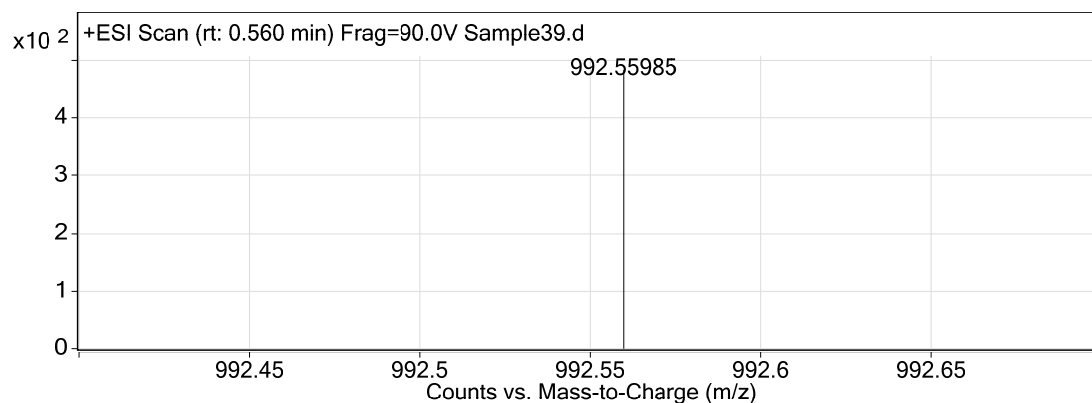

### HRMS spectrum of **Z,Z-35g**

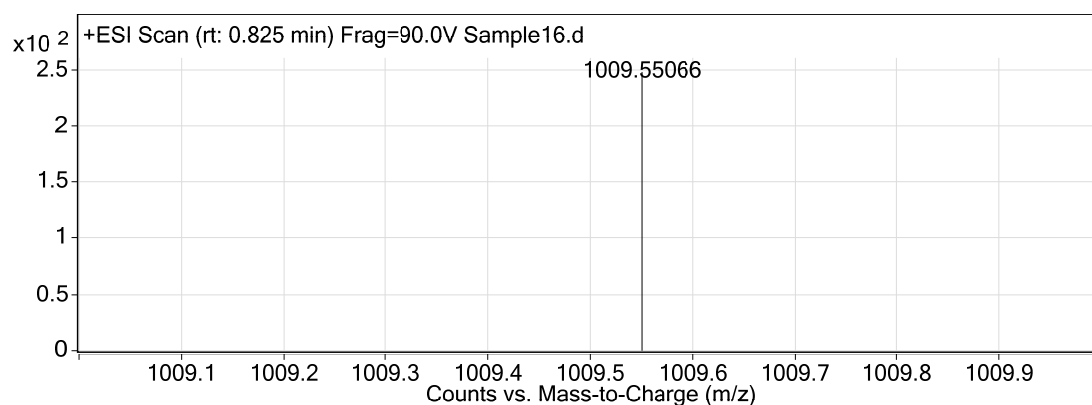

### HRMS spectrum of **E,E-35a**

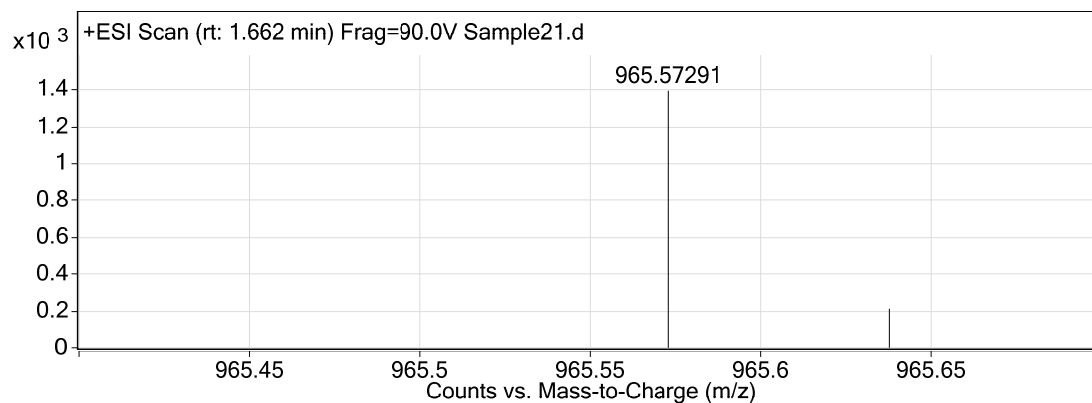

### HRMS spectrum of *E,E*-35b

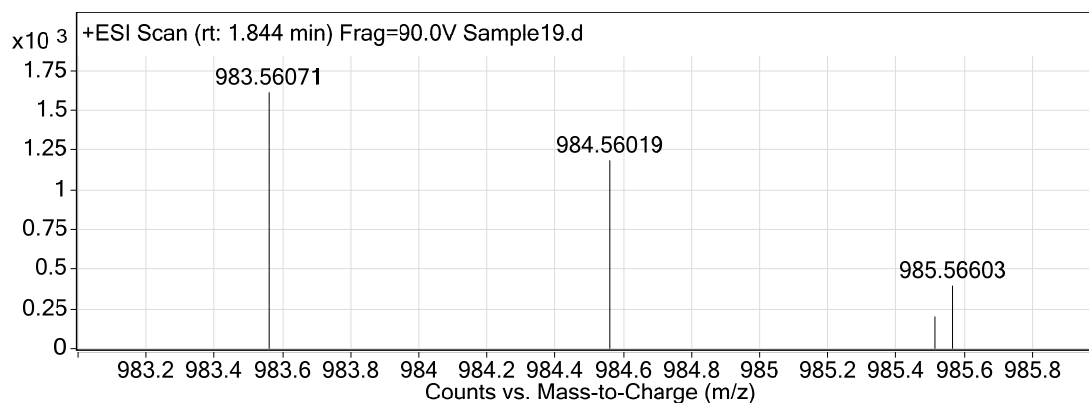

### HRMS spectrum of *E,E*-35c

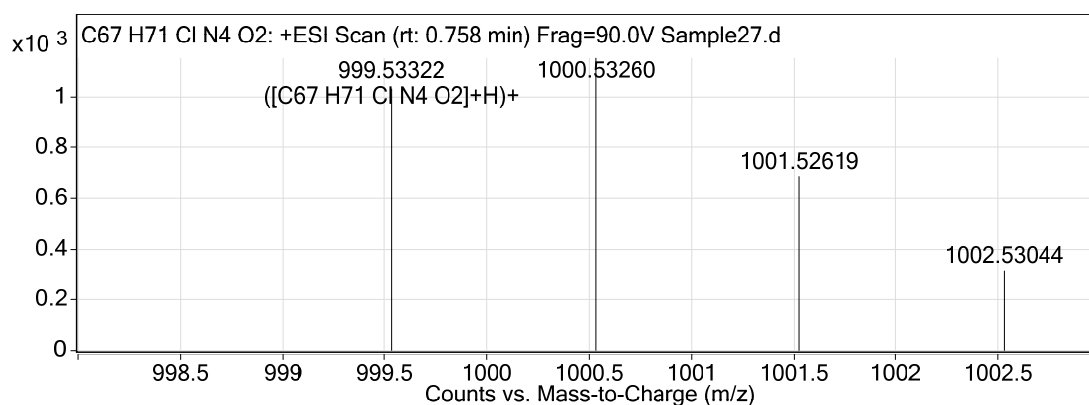

### HRMS spectrum of *E,E*-35d

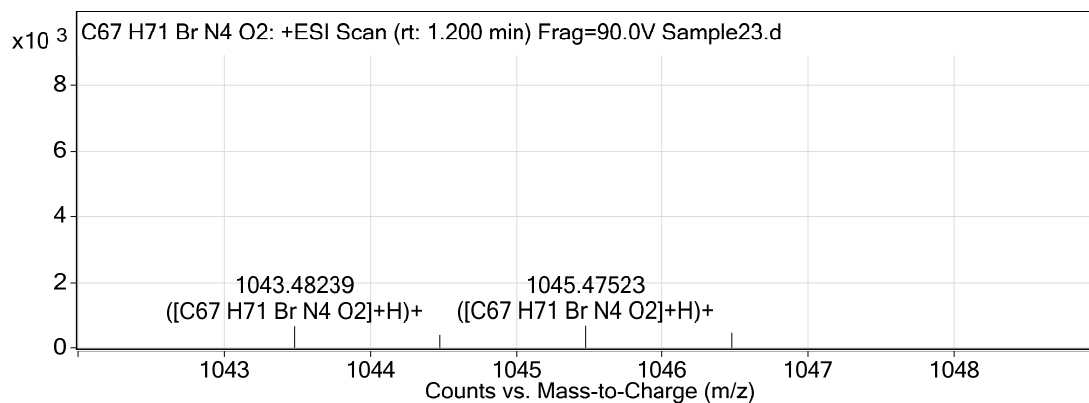

### HRMS spectrum of *E,E*-35e

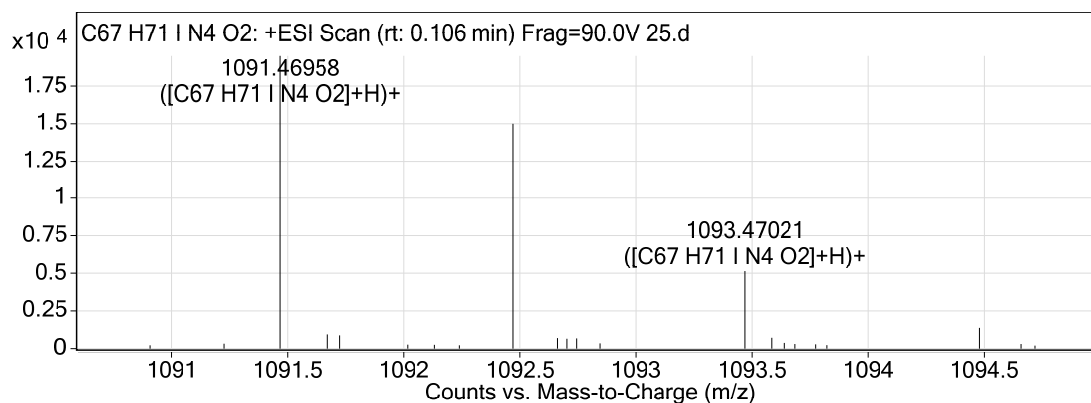

### HRMS spectrum of *E,E*-35f

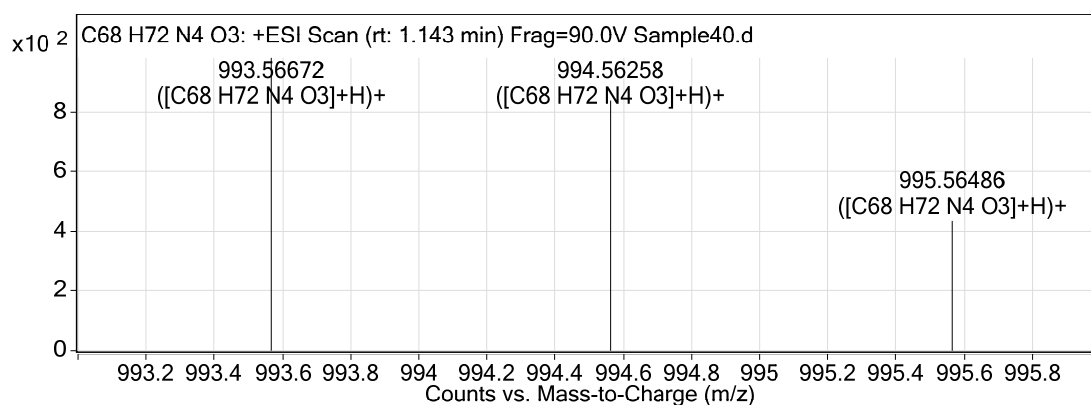

### HRMS spectrum of *E,E*-35g

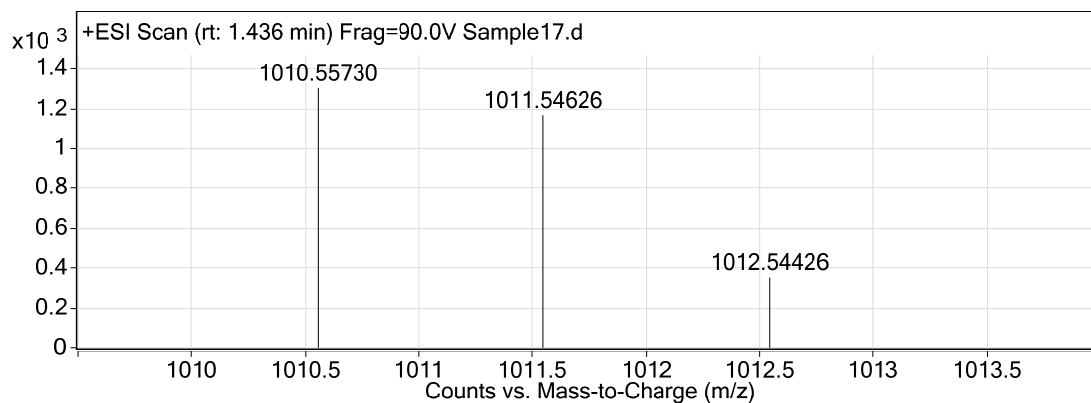



## HPLC trace for final compounds

### Compound Z-26

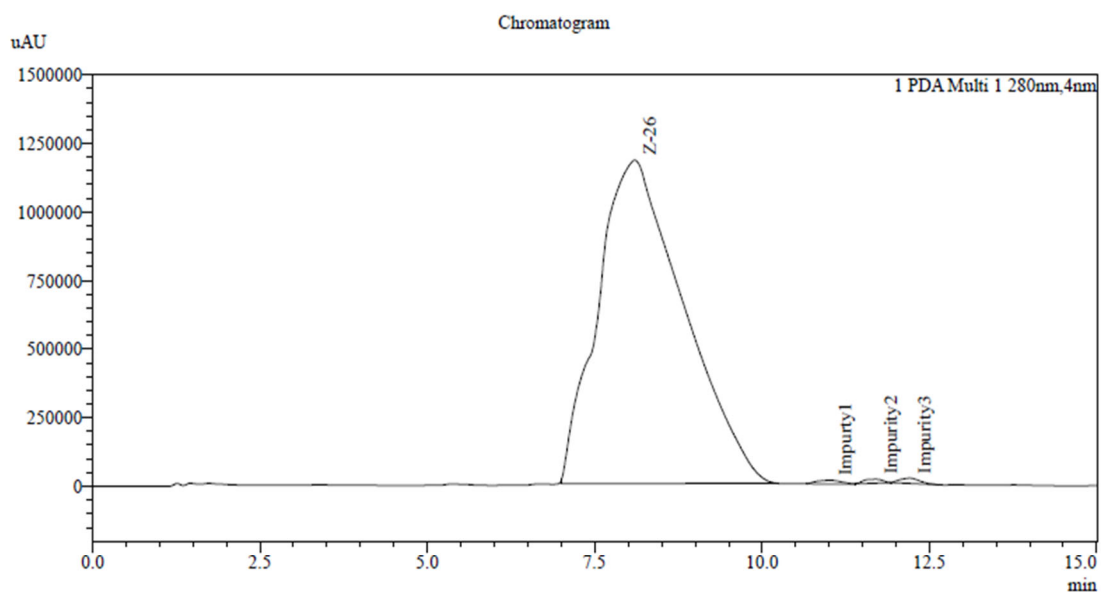

QuantitativeResult

| PDA ID# | Name      | Ret. Time | Area      | Area%   |
|---------|-----------|-----------|-----------|---------|
| 1       | Z-26      | 8.095     | 105187792 | 99.069  |
| 2       | Impurity1 | 11.013    | 329171    | 0.310   |
| 3       | Impurity2 | 11.701    | 277342    | 0.261   |
| 4       | Impurity3 | 12.204    | 381705    | 0.360   |
| Total   |           |           | 106176010 | 100.000 |

### Compound E-26

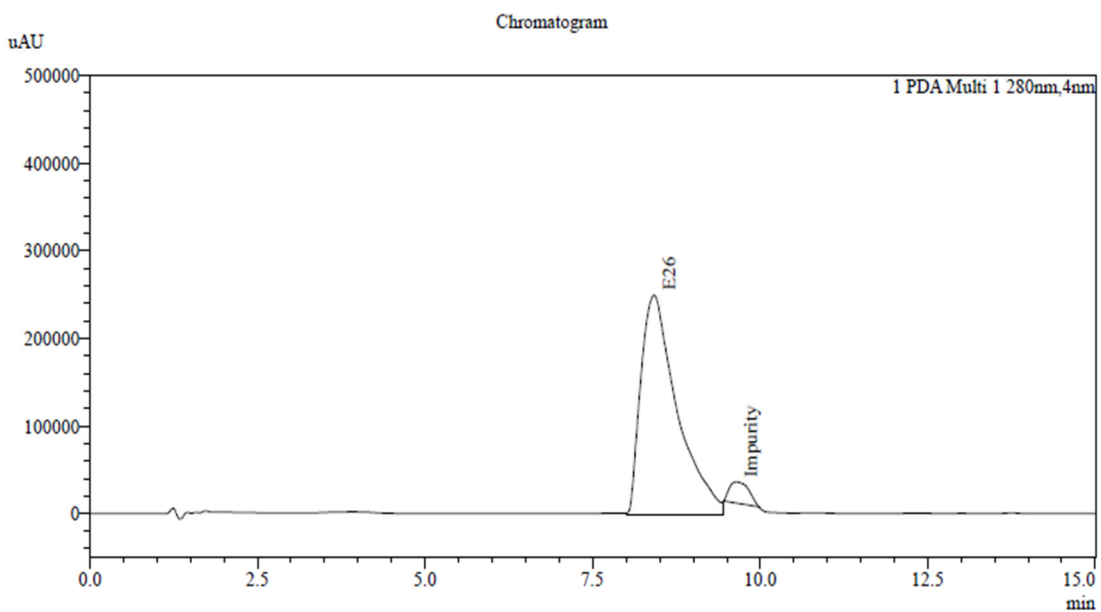

QuantitativeResult

| PDA ID# | Name     | Ret. Time | Area    | Area%   |
|---------|----------|-----------|---------|---------|
| 1       | E26      | 8.417     | 9424276 | 95.028  |
| 2       | Impurity | 9.638     | 493106  | 4.972   |
| Total   |          |           | 9917382 | 100.000 |

## Compound Z-33

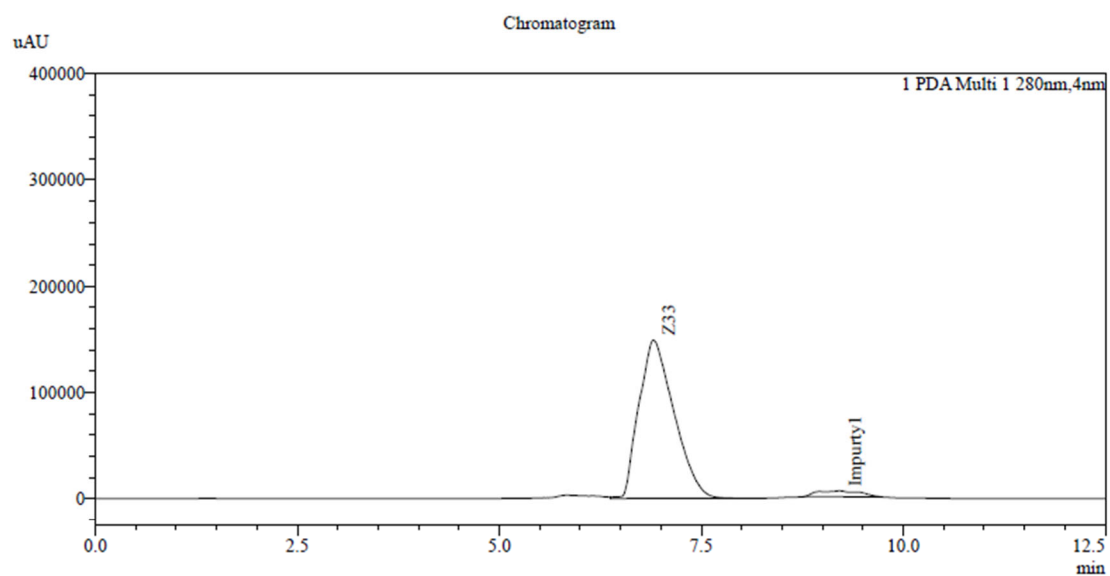

QuantitativeResult

| PDA ID# | Name      | Ret. Time | Area    | Area%   |
|---------|-----------|-----------|---------|---------|
| 1       | Z33       | 6.908     | 4504497 | 95.627  |
| 2       | Impurity1 | 9.213     | 206013  | 4.373   |
| Total   |           |           | 4710510 | 100.000 |

## Compound E-33

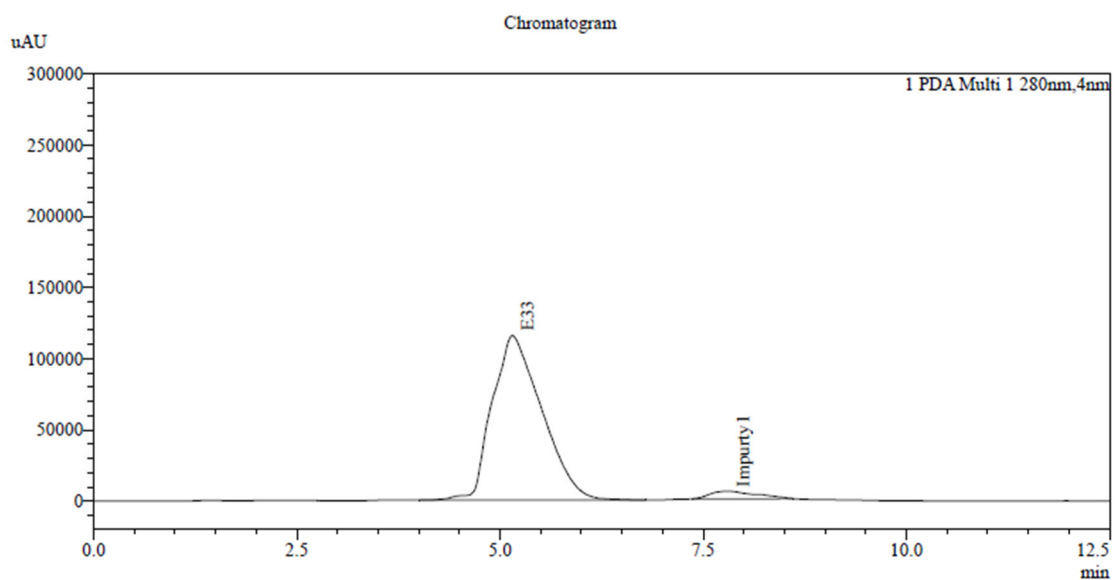

QuantitativeResult

| PDA ID# | Name      | Ret. Time | Area    | Area%   |
|---------|-----------|-----------|---------|---------|
| 1       | E33       | 5.153     | 4895245 | 95.886  |
| 2       | Impurity1 | 7.807     | 210014  | 4.114   |
| Total   |           |           | 5105260 | 100.000 |

## Compound Z,Z-35a

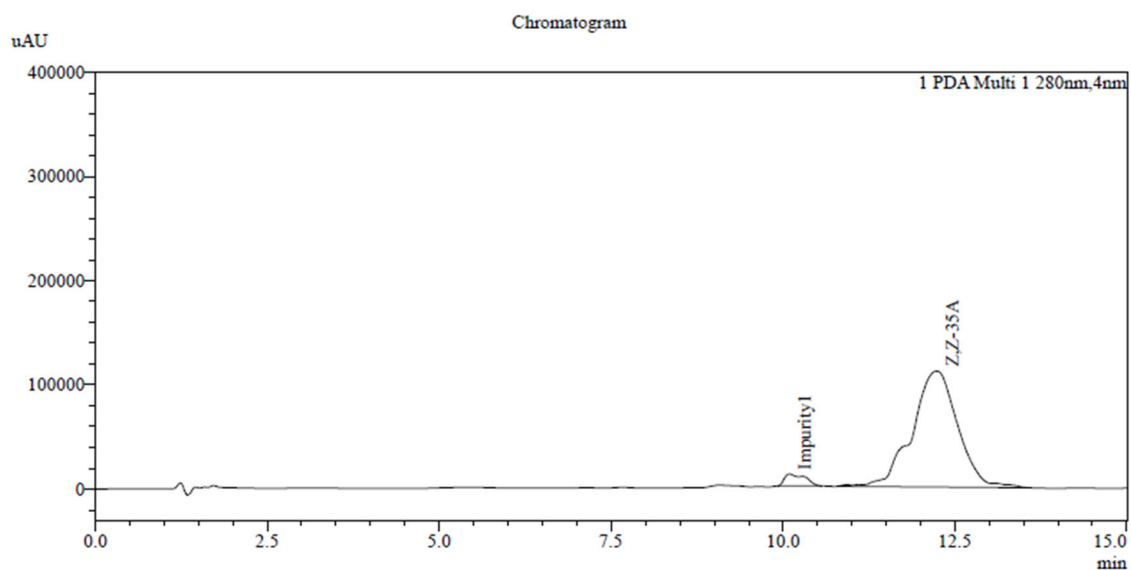

QuantitativeResult

| PDA ID# | Name      | Ret. Time | Area    | Area%   |
|---------|-----------|-----------|---------|---------|
| 1       | Impurity1 | 10.094    | 235575  | 4.380   |
| 2       | Z,Z-35A   | 12.236    | 5143203 | 95.620  |
| Total   |           |           | 5378778 | 100.000 |

## Compound Z,Z-35b

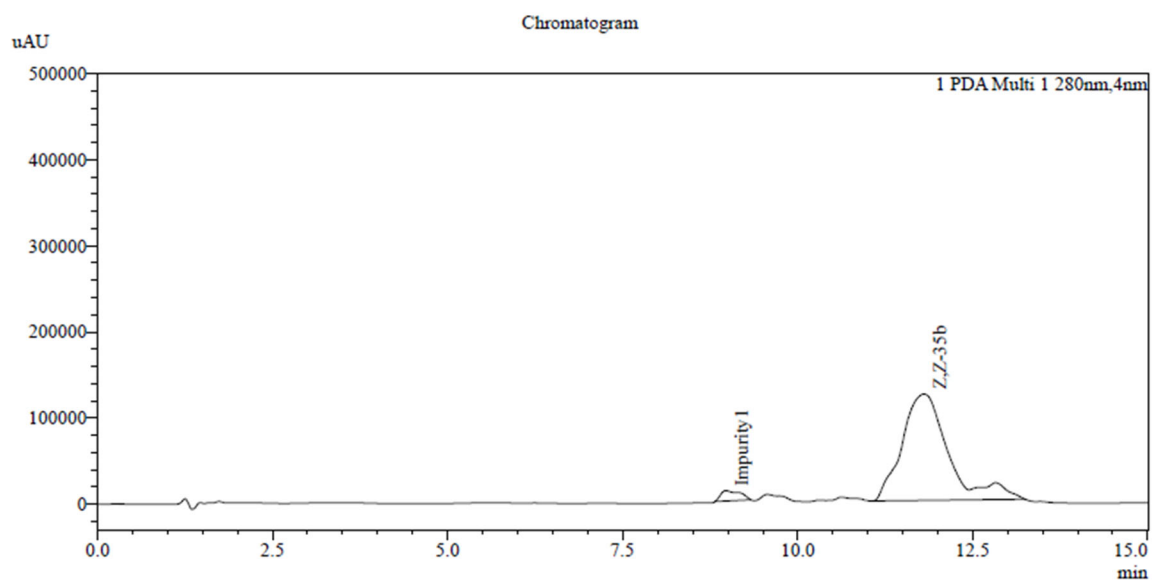

QuantitativeResult

| PDA ID# | Name      | Ret. Time | Area    | Area%   |
|---------|-----------|-----------|---------|---------|
| 1       | Impurity1 | 8.975     | 232153  | 3.918   |
| 2       | Z,Z-35b   | 11.805    | 5693774 | 96.082  |
| Total   |           |           | 5925927 | 100.000 |

## Compound Z,Z-35c

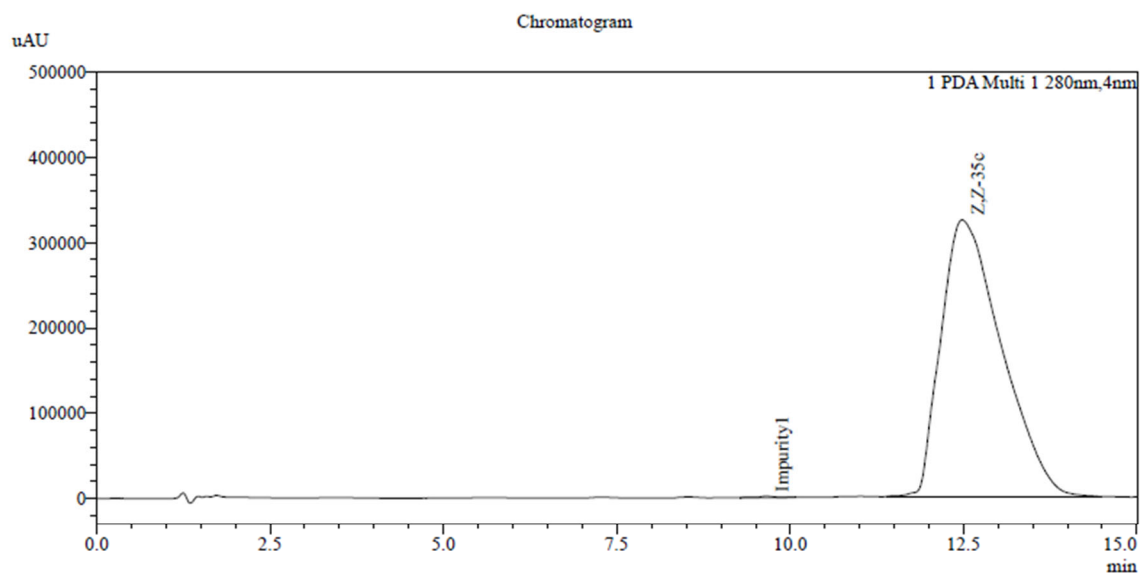

QuantitativeResult

| PDA ID# | Name      | Ret. Time | Area     | Area%   |
|---------|-----------|-----------|----------|---------|
| 1       | Impurity1 | 9.653     | 28700    | 0.145   |
| 2       | Z,Z-35c   | 12.479    | 19705150 | 99.855  |
| Total   |           |           | 19733849 | 100.000 |

## Compound Z,Z-35d

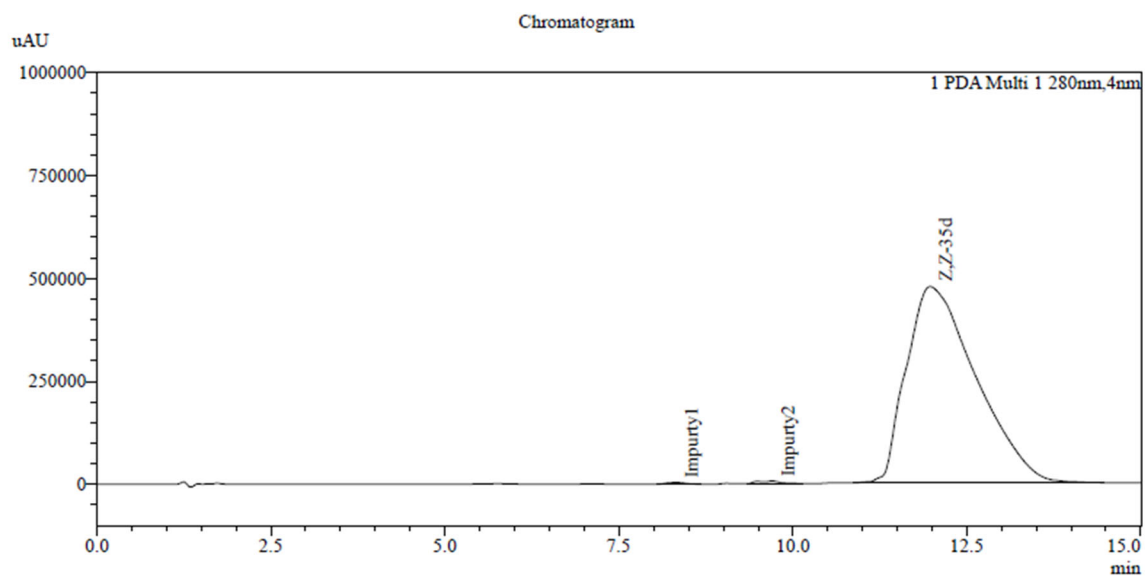

QuantitativeResult

| PDA ID# | Name      | Ret. Time | Area     | Area%   |
|---------|-----------|-----------|----------|---------|
| 1       | Impurity1 | 8.318     | 72500    | 0.217   |
| 2       | Impurity2 | 9.703     | 136579   | 0.410   |
| 3       | Z,Z-35d   | 11.973    | 33141624 | 99.373  |
| Total   |           |           | 33350703 | 100.000 |

## Compound Z,Z-35e

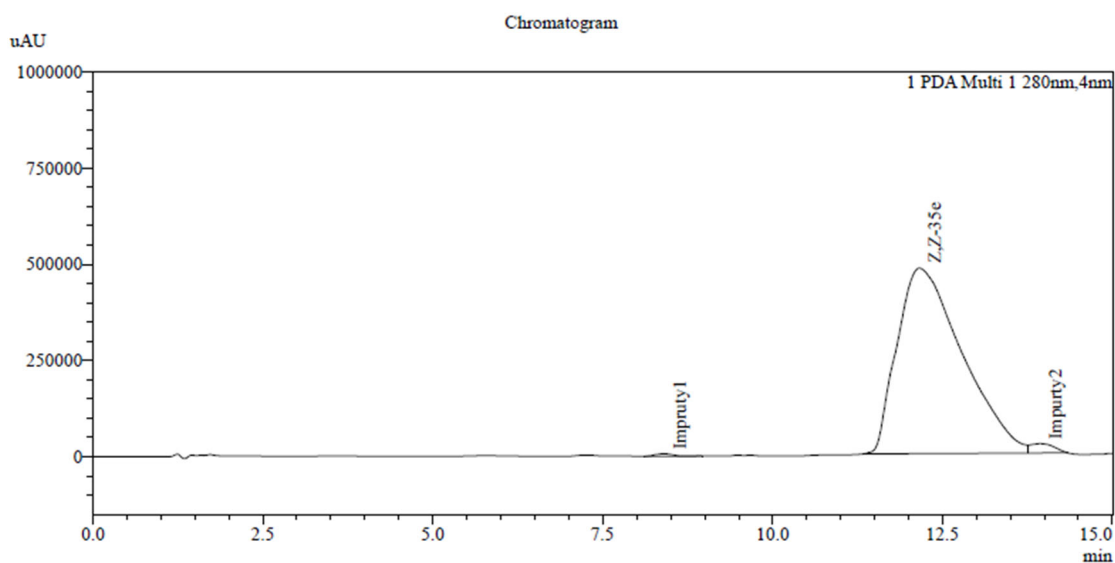

QuantitativeResult

| ID#   | Name      | Ret. Time | Area     | Area%   |
|-------|-----------|-----------|----------|---------|
| 1     | Impurity1 | 8.406     | 104782   | 0.319   |
| 2     | Z,Z-35e   | 12.160    | 32131487 | 97.904  |
| 3     | Impurity2 | 13.936    | 583077   | 1.777   |
| Total |           |           | 32819346 | 100.000 |

## Compound Z,Z-35f

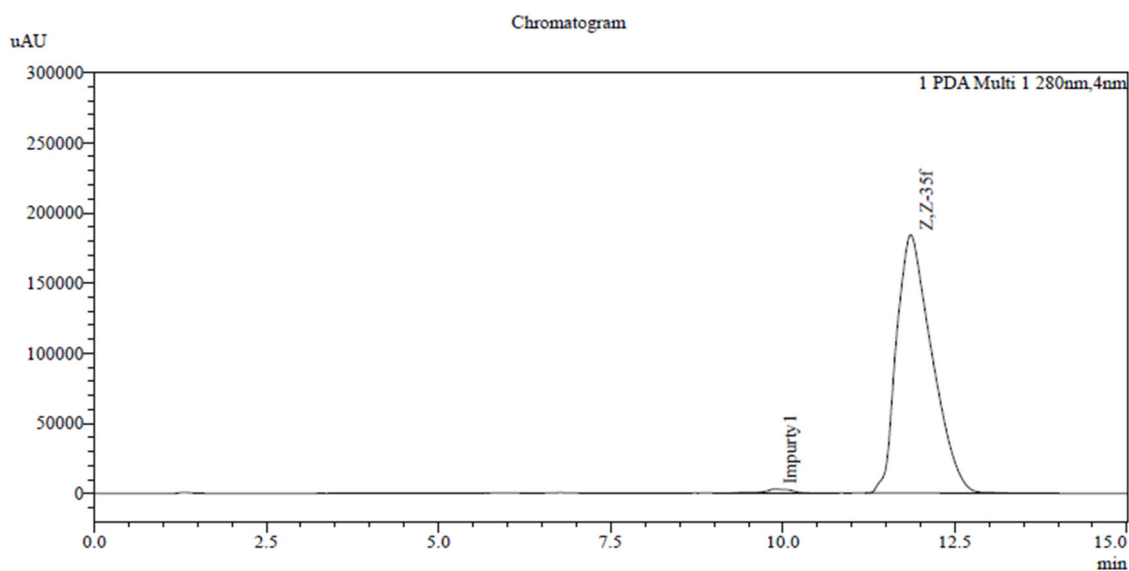

QuantitativeResult

| ID#   | Name      | Ret. Time | Area    | Area%   |
|-------|-----------|-----------|---------|---------|
| 1     | Impurity1 | 9.882     | 78642   | 1.183   |
| 2     | Z,Z-35f   | 11.858    | 6568687 | 98.817  |
| Total |           |           | 6647329 | 100.000 |

## Compound *Z,Z*-35g

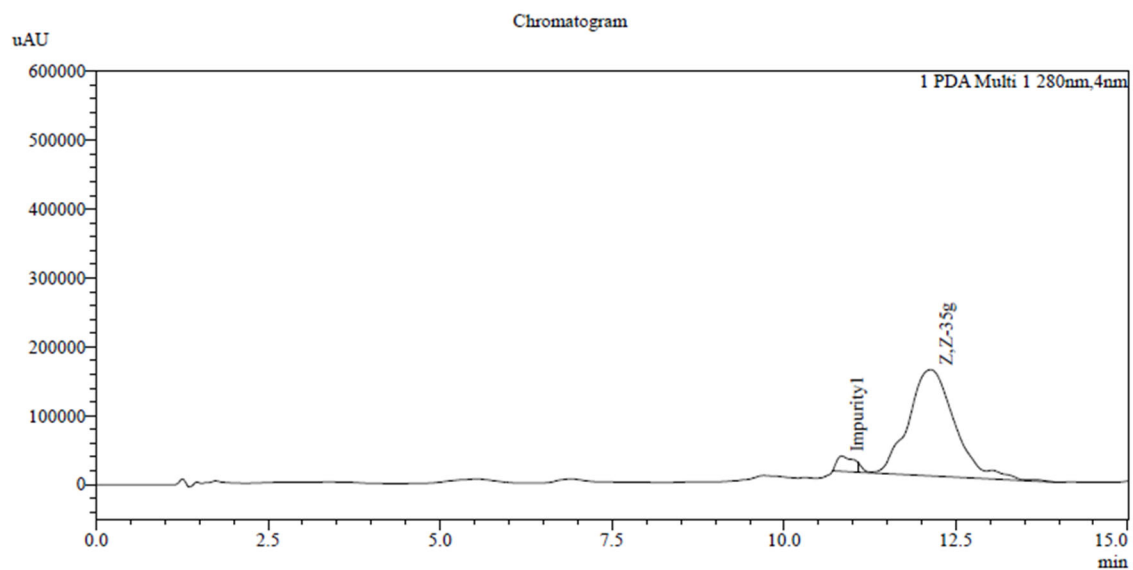

QuantitativeResult

| ID#   | Name            | Ret. Time | Area    | Area%   |
|-------|-----------------|-----------|---------|---------|
| 1     | Impurity1       | 10.839    | 374647  | 4.875   |
| 2     | <i>Z,Z</i> -35g | 12.128    | 7311104 | 95.125  |
| Total |                 |           | 7685751 | 100.000 |

## Compound *E,E*-35a

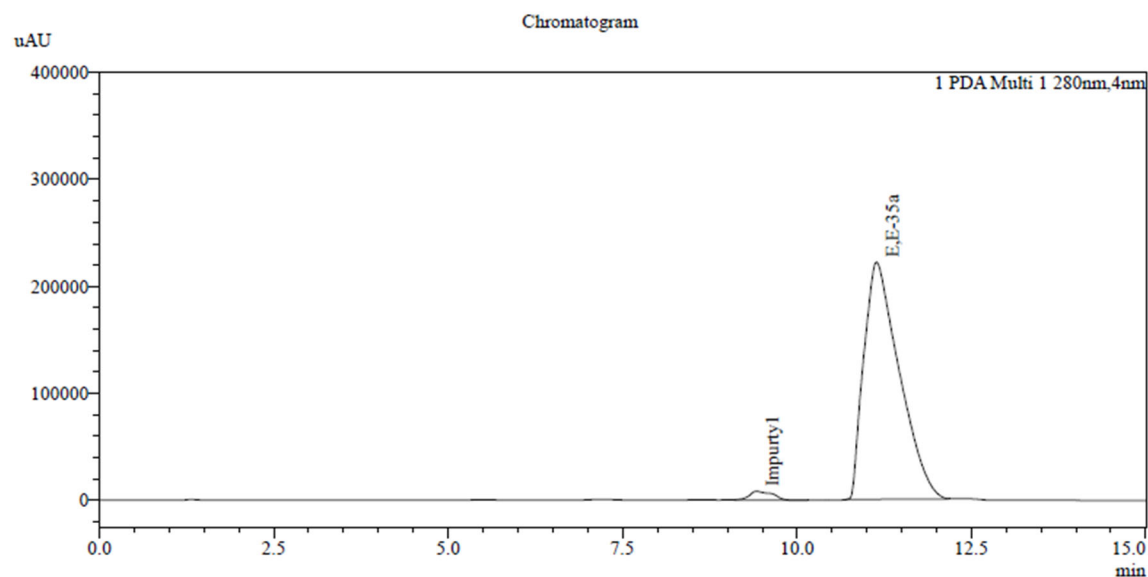

QuantitativeResult

| ID#   | Name            | Ret. Time | Area    | Area%   |
|-------|-----------------|-----------|---------|---------|
| 1     | Impurity1       | 9.420     | 194434  | 2.424   |
| 2     | <i>E,E</i> -35a | 11.140    | 7825703 | 97.576  |
| Total |                 |           | 8020137 | 100.000 |

## Compound *E,E*-35b

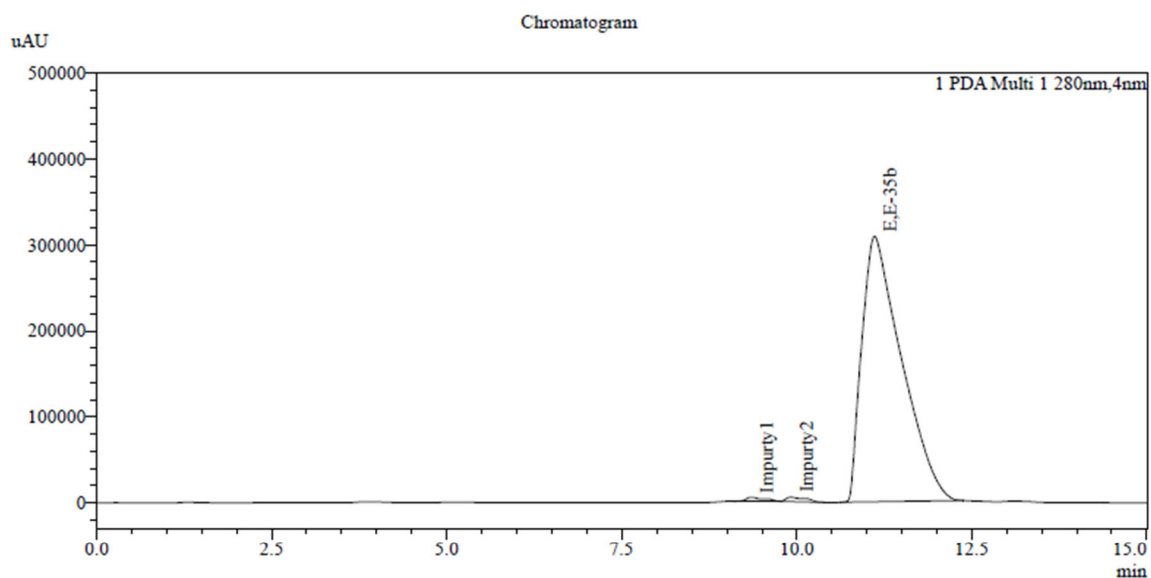

QuantitativeResult

| PDA ID# | Name      | Ret. Time | Area     | Area%   |
|---------|-----------|-----------|----------|---------|
| 1       | Impurity1 | 9.346     | 84237    | 0.681   |
| 2       | Impurity2 | 9.912     | 101323   | 0.820   |
| 3       | E,E-35b   | 11.111    | 12177886 | 98.499  |
| Total   |           |           | 12363446 | 100.000 |

## Compound *E,E*-35c

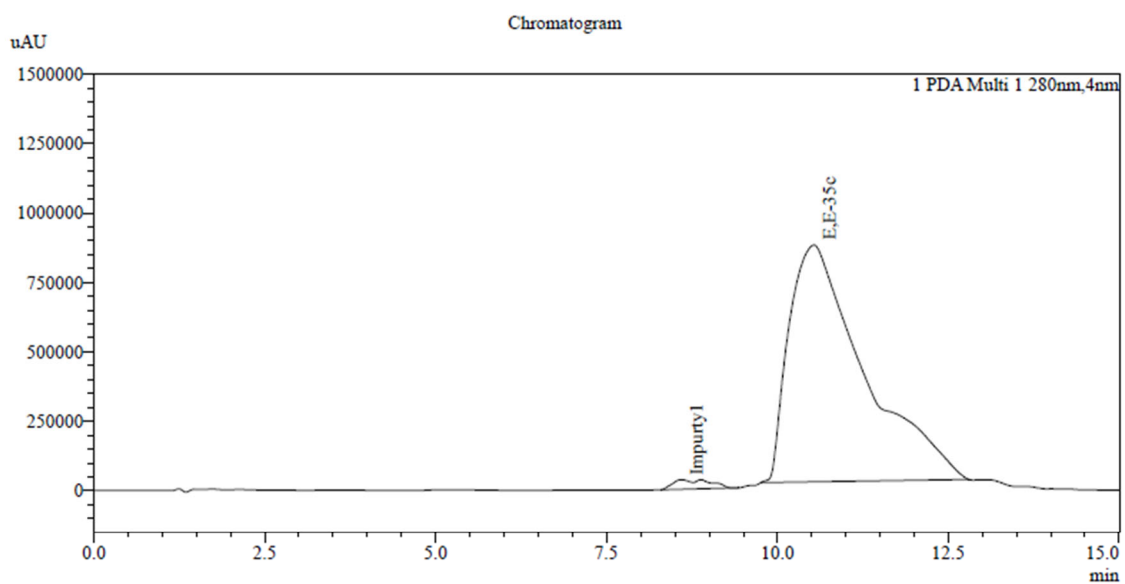

QuantitativeResult

| PDA ID# | Name      | Ret. Time | Area     | Area%   |
|---------|-----------|-----------|----------|---------|
| 1       | Impurity1 | 8.593     | 126289   | 1.911   |
| 2       | E,E-35c   | 10.533    | 64793343 | 98.089  |
| Total   |           |           | 66055632 | 100.000 |

## Compound *E,E*-35d

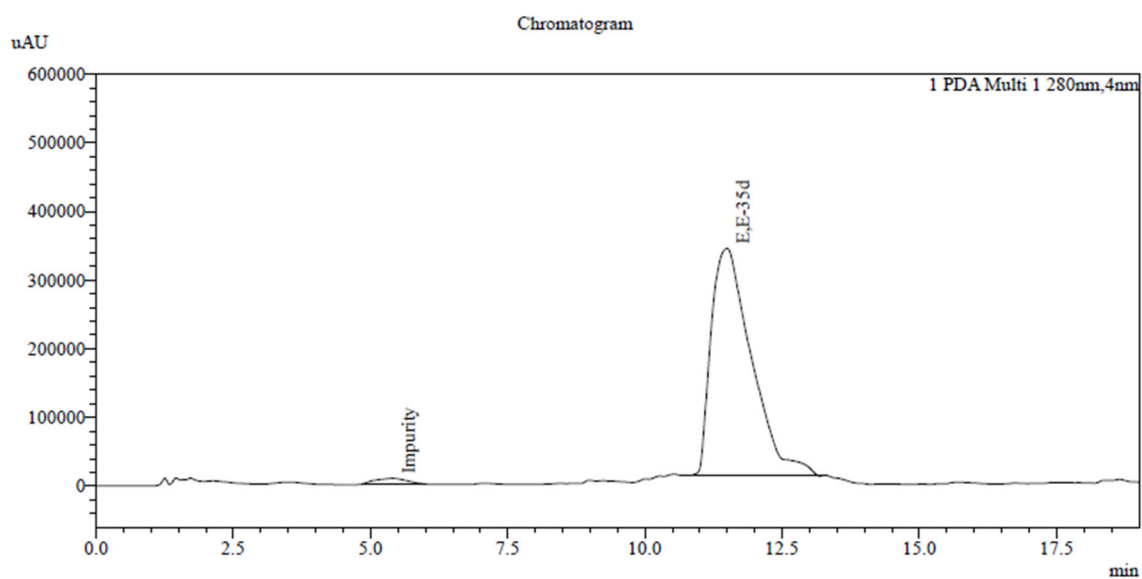

QuantitativeResult

| ID#   | Name            | Ret. Time | Area     | Area%   |
|-------|-----------------|-----------|----------|---------|
| 1     | Impurity        | 5.408     | 327165   | 1.893   |
| 2     | <i>E,E</i> -35d | 11.495    | 16956242 | 98.107  |
| Total |                 |           | 17283407 | 100.000 |

## Compound *E,E*-35e

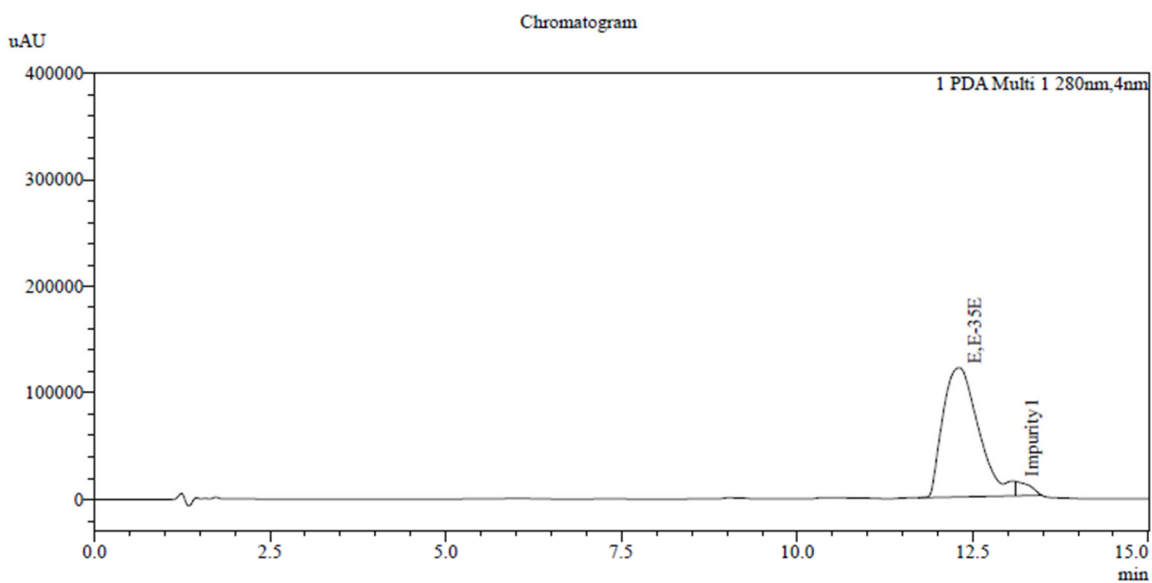

QuantitativeResult

| ID#   | Name            | Ret. Time | Area    | Area%   |
|-------|-----------------|-----------|---------|---------|
| 1     | <i>E,E</i> -35e | 12.302    | 4311501 | 95.948  |
| 2     | Impurity1       | 13.115    | 182064  | 4.052   |
| Total |                 |           | 4493564 | 100.000 |



### Compound *E,E*-35f

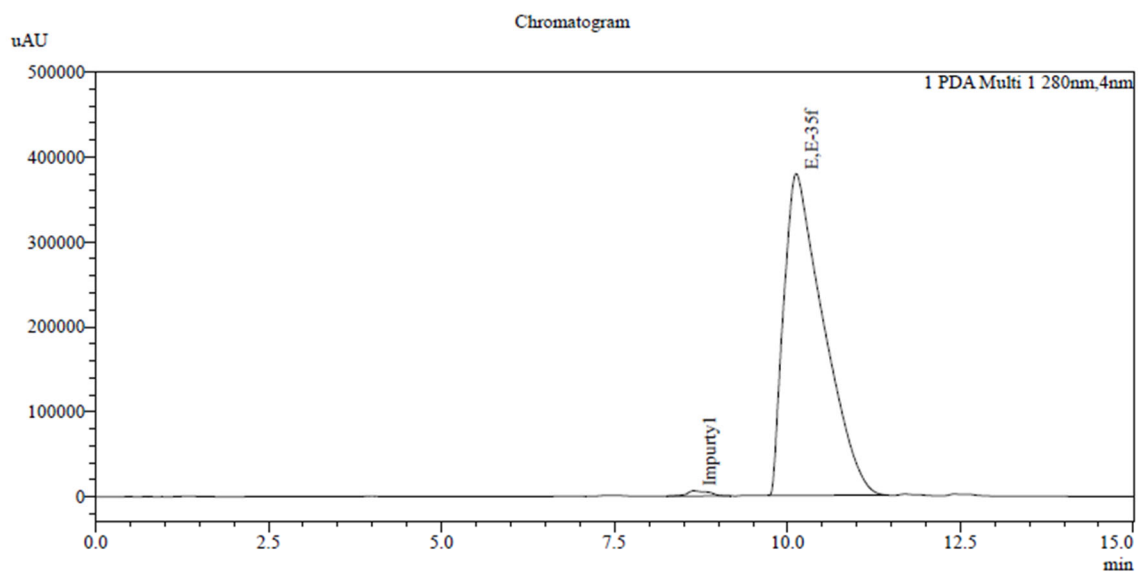

QuantitativeResult

| ID#   | Name            | Ret. Time | Area     | Area%   |
|-------|-----------------|-----------|----------|---------|
| 1     | Impurity1       | 8.646     | 133792   | 0.878   |
| 2     | <i>E,E</i> -35f | 10.126    | 15107923 | 99.122  |
| Total |                 |           | 15241715 | 100.000 |

### Compound *E,E*-35g

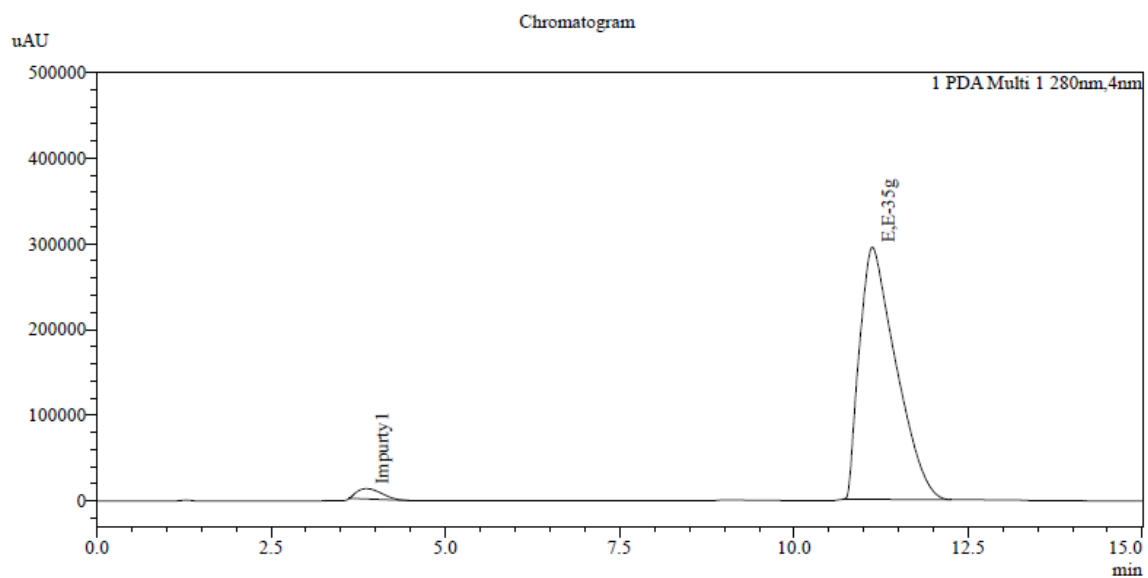

QuantitativeResult

| ID#   | Name            | Ret. Time | Area     | Area%   |
|-------|-----------------|-----------|----------|---------|
| 1     | Impurity1       | 3.868     | 292914   | 2.673   |
| 2     | <i>E,E</i> -35g | 11.126    | 10663518 | 97.327  |
| Total |                 |           | 10956432 | 100.000 |
